# Supplementary material for: High mobility at the interface of the cocrystallized sandwich-type tetrapyrrole metal compound and fullerene layers
Source: Royal Society of Chemistry journal article supplement (doi:10.1039/c9qi01130g), 2019-01-01
Supplement: c9qi01130g1.pdf [file c9qi01130g1.pdf]

## **Electronic Supplementary Information**

### **High Mobility at Interface of Cocrystallized Sandwich-type Tetrapyrrole Metal**

#### **Compound and Fullerene Layers**

Chiming Wang, Dongdong Qi, Guang Lu, Hailong Wang,\* Yanli Chen,\* and Jianzhuang Jiang\*

## Caption of Content

|                                                                                                                                                                                   |    |
|-----------------------------------------------------------------------------------------------------------------------------------------------------------------------------------|----|
| <b>Experimental and Computational Details</b> .....                                                                                                                               | 3  |
| <b>Figure S1.</b> The downfield region of the $^1\text{H}$ NMR spectra of the solutions of <b>1</b> , <b>1</b> + $\text{C}_{60}$ , and <b>1</b> + $5\text{C}_{60}$ .....          | 5  |
| <b>Table S1.</b> $^1\text{H}$ NMR data ( $\delta$ ) and assignments of <b>1</b> , <b>1</b> + $\text{C}_{60}$ , <b>1</b> + $5\text{C}_{60}$ .....                                  | 6  |
| <b>Figure S2.</b> Electronic absorption spectrum of <b>1</b> in <i>o</i> -dichlorobenzene with the concentration of $8.0 \times 10^{-6}$ M upon addition of $\text{C}_{60}$ ..... | 7  |
| <b>Figure S3.</b> Fluorescent spectrum of $\text{C}_{60}$ ( <i>o</i> -dichlorobenzene, $1.0 \times 10^{-5}$ M) upon addition of <b>1</b> .....                                    | 8  |
| <b>Figure S4.</b> Stern-Volmer plot for the fluorescent spectral change of $\text{C}_{60}$ at 450 nm upon addition of <b>1</b> .....                                              | 9  |
| <b>Figure S5.</b> The distribution diagram of devices mobilities.....                                                                                                             | 10 |
| <b>Figure S6.</b> Cyclic voltammogram of <b>1</b> (blue) and $\text{C}_{60}$ (red).....                                                                                           | 11 |
| <b>Table S2.</b> Crystal data and structure refinement of <b>2</b> .....                                                                                                          | 12 |
| <b>Table S3.</b> Crystallographic data and selected structural information for <b>2</b> .....                                                                                     | 13 |
| <b>Table S4.</b> Comparison of the ambipolar mobilities of the reported systems and the present work.....                                                                         | 14 |
| <b>Table S5.</b> CV derived and DFT calculated energy level data of <b>1</b> and $\text{C}_{60}$ .....                                                                            | 15 |
| <b>Table S6.</b> Cartesian coordinates ( $\text{\AA}$ ) and SCF energies, at 298.15 K and 1 atm for the optimized structures.....                                                 | 16 |
| <b>References</b> .....                                                                                                                                                           | 53 |

## Experimental Section

**General remarks.** All the reagents and solvents were used as received. The compound of sandwich-type triple-decker mixed (phthalocyaninato)(porphyrinato) yttrium(III) [(Pc)Y(Pc)Y(TClPP)] (**1**) was prepared according to the published procedure.<sup>1</sup> Electrochemical measurements were carried out with a BAS CV-50W voltammetric analyzer. The cell comprised inlets for a glassy carbon-disk working electrode with a diameter of 2.0 mm and a silver wire counter electrode. The reference electrode was Ag<sup>+</sup>/Ag (a solution of 0.01 M AgNO<sub>3</sub> and 0.1 M TBAP in *o*-dichlorobenzene), which was connected to the solution by a Luggin capillary, whose tip was placed close to the working electrode. It was corrected for junction potentials by being referenced internally to the ferrocenium/ferrocene (Fc<sup>+</sup>/Fc) couple [ $E_{1/2}(\text{Fc}^+/\text{Fc}) = 0.229$  V for C<sub>60</sub> and 0.210 V for **1**]. Typically, a 0.1 M solution of [NBu<sub>4</sub>][ClO<sub>4</sub>] in *o*-dichlorobenzene containing a 1 mM sample was purged with nitrogen for 10 min, and then the voltammograms were recorded at ambient temperature. Crystal data of the compound **2** was collected on a Oxford Diffraction Gemini E diffractometer with Mo *K*α radiation ( $\lambda = 0.7107$  Å) at 150 K. Final unit cell parameters were derived by global refinements of reflections obtained from integration of all the frame data. The collected frames were integrated by using the preliminary cell-orientation matrix. CrysAlisPro Agilent Technologies software was used for collecting frames of data, indexing reflections, and determination of lattice constants; CrysAlisPro Agilent Technologies for integration of intensity of reflections and scaling, SCALE3 ABSPACK for absorption correction, The structures were solved by the direct method (*SHELXS-97*) and refined by full-matrix least-squares (*SHELXL-97*) on  $F^2$ .<sup>2</sup> Anisotropic thermal parameters were used for the nonhydrogen

atoms and isotropic parameters for the hydrogen atoms. Hydrogen atoms were added geometrically and refined using a riding model. Powder X-ray diffraction (XRD) patterns were recorded with a Japan Rigaku TTR3 powder X-ray diffractometer, using Cu K $\alpha$  radiation ( $\lambda = 1.54 \text{ \AA}$ ). Crystallographic data and other pertinent information for all the complexes are summarized in Table S3. Selected structural information is listed in the Table S2. CCDC 1001325 for **2**, contains the supplementary crystallographic data for this paper. These data can be obtained free of charge from the Cambridge Crystallographic Data Centre *via* [www.ccdc.cam.ac.uk/data\\_request/cif](http://www.ccdc.cam.ac.uk/data_request/cif).

**Synthesis of [(Pc)Y(Pc)Y(TCIPP)]·C<sub>60</sub> (**2**)** Single crystals of cocrystallized fullerene-mixed(phthalocyaninato)(porphyrinato) yttrium **2** were obtained by simple diffusion of the *n*-hexane (15 mL) into the chloroform/*o*-dichlorobenzene (1:1) solution (5 mL) containing mixed (phthalocyaninato)(porphyrinato) yttrium(III) triple-decker complex **1** (0.004 mmol) and C<sub>60</sub> (2.8 mg, 0.002 mmol) with the yield of 23-41% (computed on the basis of **1**).

**Computational detail.** All structures were optimized at B3LYP-D3(BJ)/BSI level in the gas phase, where BSI represent a basis set with 6-311G(d) for C, H, N, Cl and LanL2DZ for Y atoms.<sup>3-7</sup> Visual Molecular Dynamics (VMD) software package was employed to visualize the orbital populations.<sup>8,9</sup> All calculations were carried out by Gaussian 09 D.01 and Multiwfn 3.4 version.<sup>10,11</sup>

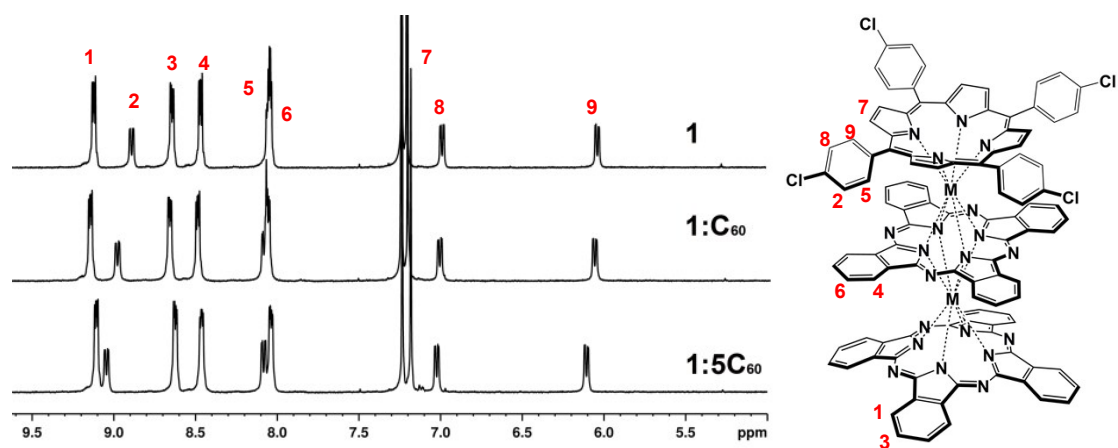

**Figure S1.** The downfield region of the  $^1\text{H}$  NMR spectra (400 MHz,  $\text{CDCl}_3/\text{CS}_2$  (2:1, v/v) solvent, 297K) of the solutions of **1**, **1** +  $\text{C}_{60}$ , and **1** + 5  $\text{C}_{60}$ , along with the assignment of each peak.

**Table S1.**  $^1\text{H}$  NMR data ( $\delta$ ) and assignments of the sandwich-type mixed (phthalocyaninato)(porphyrinato) triple-decker complexes in **1**, **1** +  $\text{C}_{60}$ , **1** +  $5\text{C}_{60}$  (400 MHz,  $\text{CDCl}_3/\text{CS}_2$  (2:1, v/v) solvent, 297K).

| Compound                 | $\text{Pc}^{\text{inner}}$ |                         | $\text{Pc}^{\text{outer}}$ |                  |
|--------------------------|----------------------------|-------------------------|----------------------------|------------------|
|                          | $\text{H}^\alpha$          | $\text{H}^\beta$        | $\text{H}^\alpha$          | $\text{H}^\beta$ |
| <b>1</b>                 | 8.46 (d)                   | 8.03 (m) <sup>[b]</sup> | 9.11 (dd)                  | 8.63 (d)         |
| <b>1+C<sub>60</sub></b>  | 8.46 (d)                   | 8.03 (m) <sup>[b]</sup> | 9.11 (dd)                  | 8.63 (d)         |
| <b>1+5C<sub>60</sub></b> | 8.45 (d)                   | 8.03 (m) <sup>[b]</sup> | 9.10 (dd)                  | 8.61 (d)         |

  

| Compound [a]             | TCIPP <sup>outer</sup>         |                               |                               |                              |                                   |
|--------------------------|--------------------------------|-------------------------------|-------------------------------|------------------------------|-----------------------------------|
|                          | $\text{H}^{\text{endo-ortho}}$ | $\text{H}^{\text{endo-meta}}$ | $\text{H}^{\text{exo-ortho}}$ | $\text{H}^{\text{exo-meta}}$ | $\text{H}^{\beta\text{-pyrrole}}$ |
| <b>1</b>                 | 8.88 (dd)                      | 8.03 (b)                      | 6.97 (dd)                     | 6.02 (dd)                    | 7.20 (s)                          |
| <b>1+C<sub>60</sub></b>  | 8.94 (dd)                      | 8.03 (b)                      | 6.99 (dd)                     | 6.04 (dd)                    | 7.19 (s)                          |
| <b>1+5C<sub>60</sub></b> | 9.03 (dd)                      | 8.10 (dd)                     | 7.01 (dd)                     | 6.10 (dd)                    | 7.18 (s)                          |

[a] Multiplicities: s = singlet, d = doublet, dd = double doublet, b broad

[b] Overlapped signal between the  $\text{H}^\beta$  of the  $\text{Pc}^{\text{inner}}$  ring and  $\text{H}^{\text{endo-meta}}$  of the TCIPP ring.

[c] Obscured by the strong residual  $\text{CHCl}_3$  signal at  $\delta$  7.26.

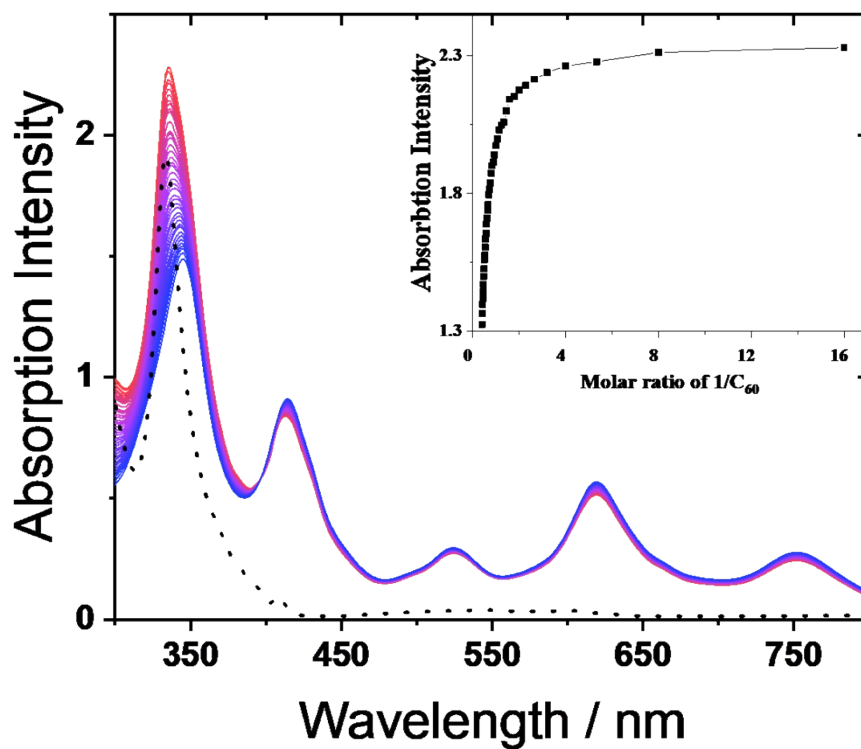

**Figure S2.** Electronic absorption spectrum of **1** in *o*-dicholobenzene with the concentration of  $8.0 \times 10^{-6}$  M upon addition of C<sub>60</sub>. Changed intensity at 345 nm is shown in the insert diagram. The absorption of C<sub>60</sub> is drawn by dash line.

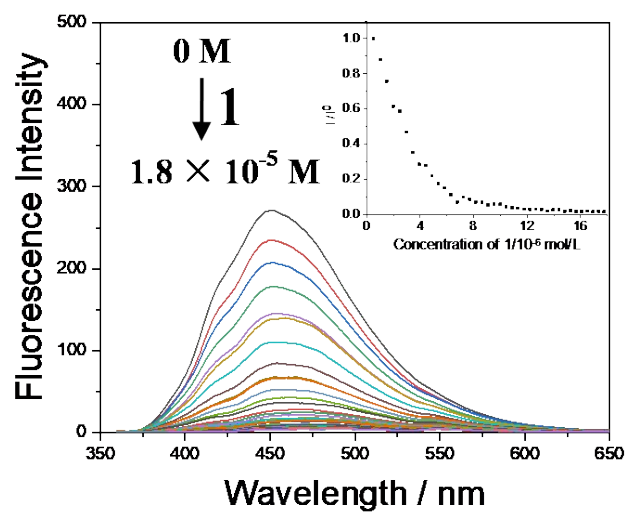

**Figure S3.** Fluorescent spectrum of  $C_{60}$  (*o*-dichlorobenzene,  $1.0 \times 10^{-5} \text{ M}$ ) upon addition of **1** (*o*-dichlorobenzene,  $2.0 \times 10^{-4} \text{ M}$ ) ( $\lambda_{\text{ex}} = 340 \text{ nm}$ ). Emission quenching upon addition of **1** curve is shown in the inserted diagram.



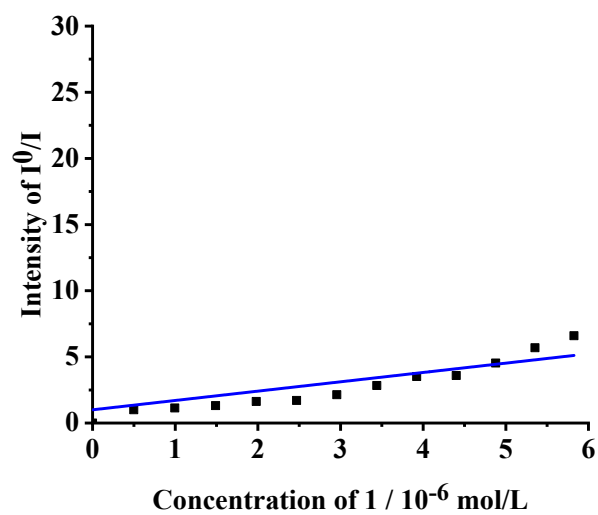

**Figure S4.** Stern-Volmer plot for the fluorescent spectral change of C<sub>60</sub> at 450 nm upon addition of **1**.

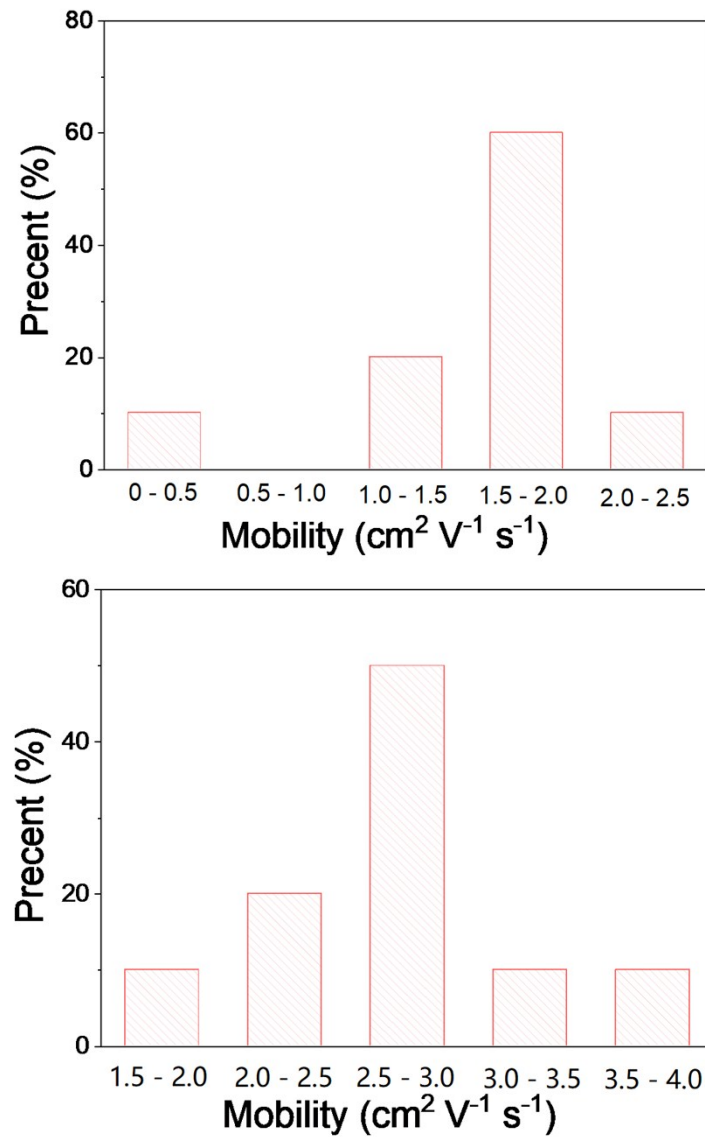

**Figure S5.** The distribution diagram of devices mobilities.

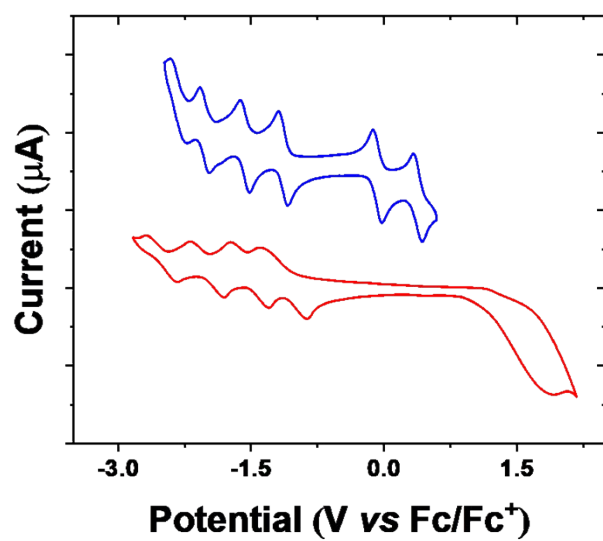

**Figure S6.** Cyclic voltammogram of **1** (blue) and C<sub>60</sub> (red)<sup>S12</sup> in o-dichlorobenzene containing 0.1 M [NBu<sub>4</sub>][ClO<sub>4</sub>] at a scan rate of 40 mV/s.

**Table S2.** Crystal data and structure refinement of complex **2**.

| complex                                 | <b>2</b>                                                                                          |
|-----------------------------------------|---------------------------------------------------------------------------------------------------|
| Formula                                 | C <sub>182</sub> H <sub>64</sub> Cl <sub>6</sub> N <sub>20</sub> O <sub>5</sub><br>Y <sub>2</sub> |
| F.W.                                    | 3001.05                                                                                           |
| system                                  | Monoclinic                                                                                        |
| space group                             | <i>C</i> 2/m                                                                                      |
| <i>a</i>                                | 30.121(3)                                                                                         |
| <i>b</i>                                | 25.7007(19)                                                                                       |
| <i>c</i>                                | 18.6170(17)                                                                                       |
| $\alpha$                                | 90                                                                                                |
| $\beta$                                 | 105.358(10)                                                                                       |
| $\gamma$                                | 90                                                                                                |
| <i>Z</i>                                | 4                                                                                                 |
| volume                                  | 13897(2)                                                                                          |
| absorption coefficient mm <sup>-1</sup> | 1.057                                                                                             |
| <i>F</i> 000                            | 6168                                                                                              |
| $R_{\text{int}} I > 2\theta$            | 0.1495                                                                                            |
| $R_{w2} I > 2\theta$                    | 0.3900                                                                                            |
| $R_{\text{int}}$ all                    | 0.2364                                                                                            |
| $R_{w2}$ all                            | 0.4345                                                                                            |
| <i>S</i>                                | 1.213                                                                                             |

---

<sup>a</sup>  $R_1 = \Sigma |F_o - |F_c|| / \Sigma |F_o|$ , <sup>b</sup>  $R_{w2} = [\Sigma w(F_o^2 - F_c^2)^2 / \Sigma w(F_o^2)^2]^{1/2}$ .

**Table S3.** Crystallographic data and selected structural information for **2**.

| complex                                                                                     | 2              |
|---------------------------------------------------------------------------------------------|----------------|
| average Y-N(TCIPP) bond distance (Å)                                                        | 2.36           |
| average Y-N(Pc) bond distance (Å)                                                           | 2.34/2.59/2.64 |
| Y-N <sub>4</sub> (Pc) plane distance (Å)                                                    | 1.25/1.74/1.81 |
| Y-N <sub>4</sub> (TCIPP) plane distance (Å)                                                 | 1.16           |
| interplanar distance (Å)                                                                    | 2.97/3.00      |
| dihedral angle between the adjacent two N <sub>4</sub> planes (°)                           | 0.9            |
| dihedral angle $\varphi$ for the Pc ring (°) <sup>a</sup>                                   | 9.3/15.3       |
| dihedral angle $\varphi$ for the TCIPP ring (°) <sup>a</sup>                                | 14.2           |
| twist angle (°) <sup>b</sup>                                                                | 44.8           |
| dihedral angle $\theta$ between the benzene rings and the N <sub>4</sub> plane of TCIPP (°) | 62.7           |
| separation of 6:6 ring juncture and mean N <sub>4</sub> plane of Pc (Å)                     | 2.87           |
| separation of 6:6 ring juncture and mean N <sub>4</sub> plane of TCIPP (Å)                  | 2.88           |

<sup>a</sup> The average dihedral angle of the individual pyrrole or isoindole ring with respect to the corresponding N<sub>4</sub> mean plane.

<sup>b</sup> Defined as the rotation angle of one macrocycle away from the eclipsed conformation of the two macrocycles.

**Table S4.** Cyclic voltammogram derived and DFT calculated energy level data of **1** and C<sub>60</sub>.

| Compound                       | HOMO <sub>CV</sub> <sup>a</sup> | LUMO <sub>CV</sub> | HOMO <sub>Cal</sub> <sup>b</sup> | LUMO <sub>Cal</sub> |
|--------------------------------|---------------------------------|--------------------|----------------------------------|---------------------|
| <b>1</b>                       | -4.72                           | -3.66              | -4.74                            | -3.47               |
| C <sub>60</sub> <sup>[3]</sup> | -6.34                           | -3.66              | -6.41                            | -3.65               |

<sup>a</sup> The HOMO<sub>CV</sub> is derived from cyclic voltammogram analysis result. <sup>b</sup> The HOMO<sub>Cal</sub> is calculated on the level of B3LYP-D3(BJ)/6-311G(d)/LanL2DZ.

**Table S5.** Comparison of the ambipolar mobilities of the reported systems and the present work.

|    | Compounds                                                                       | Electron<br>Mobility<br>( $\mu_e$ )<br>$\text{cm}^2/\text{Vs}$ | Hole<br>Mobility<br>( $\mu_h$ )<br>$\text{cm}^2/\text{Vs}$ | HOMO<br>Energy<br>Level<br>eV | LUMO<br>Energy<br>Level<br>eV | References |
|----|---------------------------------------------------------------------------------|----------------------------------------------------------------|------------------------------------------------------------|-------------------------------|-------------------------------|------------|
| 1  | CoTMPP-C <sub>60</sub> nanosheet                                                | 10 <sup>-5</sup>                                               | 10 <sup>-6</sup>                                           | -                             | -                             | 13         |
| 2  | DPTTA-DTTCNQ                                                                    | 0.24                                                           | 0.77                                                       | -4.92                         | -4.53                         | 14         |
| 3  | Octanaphthoxy<br>substituted<br>tris(phthalocyaninato)<br>europium              | 1.25                                                           | 1.71                                                       | -5.07                         | -4.00                         | 15         |
| 4  | TPA-C <sub>60</sub> Crystals                                                    | 2.11 x<br>10 <sup>-4</sup>                                     | 3.37 x<br>10 <sup>-4</sup>                                 | -5.20                         | -3.94                         | 16         |
| 5  | [Pc-(OPh) <sub>8</sub> ]Eu[Pc(OPh) <sub>8</sub> ]Eu<br>[TP(C $\equiv$ CCOOH)PP] | 4 $\times$ 10 <sup>-4</sup>                                    | 0.11                                                       | -5.05                         | -3.89                         | 17         |
| 6  | CoTMPP- C <sub>70</sub> cocrystals                                              | 0.02                                                           | 4.21                                                       | -                             | -                             | 18         |
| 7  | dif-TES-ADT-BPE-PTCDI                                                           | 0.43                                                           | 0.32                                                       | -                             | -                             | 19         |
| 8  | Hexacene Diimides                                                               | 2.17                                                           | 0.30                                                       | -5.56                         | -4.41                         | 20         |
| 9  | PDBD-Se                                                                         | 7.71                                                           | 8.90                                                       | -5.03                         | -3.85                         | 21         |
| 10 | TFT-CN-C6-DPA                                                                   | 0.87                                                           | 0.82                                                       | -5.05                         | -4.55                         | 22         |
| 11 | (Pc)Y(Pc)Y (TCIPP)                                                              | 2.22                                                           | 3.72                                                       | -4.72                         | -3.66                         | This work  |

**Table S6.** Cartesian coordinates (Å) and SCF energies, at 298.15 K and 1 atm for the optimized structures.

All energies are given in Hartree and on the basis of B3LYP-D3(BJ)/BSI.

[(TCIPP)Y(Pc)Y(TCIPP)] · C<sub>60</sub> · [(TCIPP)Y(Pc)Y(TCIPP)](2)

SCF Energy: -16614.01141320

|   |            |             |             |
|---|------------|-------------|-------------|
| C | 3.73263906 | 0.52083333  | 0.00000000  |
| C | 4.02505406 | 1.70484933  | -0.79728700 |
| C | 4.31249406 | 3.02234833  | -0.45060000 |
| H | 4.32400906 | 3.32480933  | 0.58951100  |
| C | 4.57663706 | 3.91858633  | -1.48084400 |
| H | 4.79714606 | 4.95514933  | -1.24789600 |
| C | 4.58938106 | 3.49838233  | -2.82338300 |
| H | 4.81116906 | 4.22478833  | -3.59822000 |
| C | 4.31128606 | 2.18135633  | -3.17288700 |
| H | 4.31654706 | 1.84787433  | -4.20353500 |
| C | 4.02278306 | 1.28906333  | -2.14380800 |
| C | 3.72995806 | -0.13849767 | -2.13477700 |
| C | 3.77504406 | -2.21678367 | -3.21115500 |
| C | 4.10051906 | -3.01461567 | -4.38557100 |
| C | 4.42967706 | -2.66810067 | -5.69289000 |
| H | 4.44440006 | -1.62799467 | -5.99553600 |
| C | 4.74186906 | -3.69611367 | -6.57671800 |
| H | 4.99913906 | -3.45761767 | -7.60347700 |
| C | 3.75753006 | -0.57835467 | 2.06933400  |
| C | 4.07212606 | -0.56847167 | 3.49149200  |
| C | 4.39373306 | 0.45869333  | 4.37327700  |
| H | 4.41039306 | 1.48775133  | 4.03501800  |
| C | 4.69446806 | 0.10581133  | 5.68450100  |
| H | 4.94620006 | 0.87754033  | 6.40432500  |
| C | 0.59780106 | -0.51979767 | 2.00942900  |



|   |             |             |             |
|---|-------------|-------------|-------------|
| C | 0.76660606  | 0.89607533  | 2.27570000  |
| C | 1.05783606  | 1.59211333  | 3.44657600  |
| H | 1.13837606  | 1.06931433  | 4.39144900  |
| C | 1.26261806  | 2.96398633  | 3.34472300  |
| H | 1.49806206  | 3.53861233  | 4.23416300  |
| C | 1.17748106  | 3.62314533  | 2.10462000  |
| H | 1.34221906  | 4.69437733  | 2.06344900  |
| C | 0.90574406  | 2.92545833  | 0.93249800  |
| H | 0.87215306  | 3.41932633  | -0.03063800 |
| C | 0.70758306  | 1.55102833  | 1.03111000  |
| C | 0.54289506  | 0.51529133  | 0.02581100  |
| C | 0.54887006  | -0.19106867 | -2.19316200 |
| C | 0.71714406  | 0.07741233  | -3.61134000 |
| C | 0.91070006  | 1.25764233  | -4.32358500 |
| H | 0.86411906  | 2.21734033  | -3.82407600 |
| C | 1.19374206  | 1.15223333  | -5.68111700 |
| H | 1.35438306  | 2.05178733  | -6.26541000 |
| C | 1.29644206  | -0.10134367 | -6.31097900 |
| H | 1.54275606  | -0.14457167 | -7.36653500 |
| C | 1.09500106  | -1.28146667 | -5.60300200 |
| H | 1.18793006  | -2.25326567 | -6.07157500 |
| C | 0.78919906  | -1.17553667 | -4.24855600 |
| C | 0.61559906  | -2.18091167 | -3.21717100 |
| N | 0.48445606  | -0.72492667 | 0.64417300  |
| N | 0.49444906  | -1.56063267 | -1.98357400 |
| C | -3.04658094 | -0.52481567 | 3.54559400  |
| H | -3.33002394 | 0.33696033  | 4.13224000  |
| C | -2.68285394 | -0.52022767 | 2.14426500  |
| C | -2.72299994 | 0.61808933  | 1.32188700  |
| C | -2.61575294 | 0.62556933  | -0.07911800 |
| C | -2.75222794 | 1.80593033  | -0.90149800 |
| H | -2.83773394 | 2.81641333  | -0.53578000 |

|    |             |             |             |
|----|-------------|-------------|-------------|
| C  | -2.75402194 | 1.39314733  | -2.19783800 |
| H  | -2.83670694 | 2.00793933  | -3.07926800 |
| C  | -2.61605394 | -0.04510467 | -2.18780000 |
| C  | -2.72169894 | -0.86219567 | -3.32663600 |
| C  | -2.66477994 | -2.26713367 | -3.34375900 |
| C  | -3.01498694 | -3.07469067 | -4.48715100 |
| H  | -3.28683094 | -2.70294467 | -5.46175100 |
| C  | -4.32640794 | 2.50383933  | 1.72101300  |
| H  | -5.02110794 | 2.01007033  | 1.05131100  |
| C  | -3.08237994 | 1.91417833  | 1.97519600  |
| C  | -2.21115594 | 2.55635033  | 2.85564300  |
| H  | -1.25071594 | 2.11396233  | 3.07024900  |
| C  | -2.55355294 | 3.76382033  | 3.45593100  |
| H  | -1.86233194 | 4.25925833  | 4.12630900  |
| C  | -3.79079794 | 4.33026833  | 3.17818500  |
| C  | -4.68740594 | 3.70737333  | 2.31669700  |
| H  | -5.65342194 | 4.15543933  | 2.11929400  |
| C  | -3.08638394 | -0.17694167 | -4.60745000 |
| C  | -2.21960694 | -0.16218867 | -5.70118300 |
| H  | -1.26447394 | -0.65872367 | -5.62845300 |
| C  | -2.55969294 | 0.48832533  | -6.88247100 |
| H  | -1.87055094 | 0.50577433  | -7.71756200 |
| C  | -3.79122594 | 1.12397133  | -6.97391200 |
| C  | -4.68570994 | 1.11022933  | -5.90921500 |
| H  | -5.64856394 | 1.59746433  | -6.00081200 |
| C  | -4.32630094 | 0.46053433  | -4.73350500 |
| H  | -5.02124494 | 0.43906733  | -3.90180500 |
| Cl | -4.22763794 | 1.95895533  | -8.45991000 |
| Cl | -4.23291294 | 5.85883133  | 3.92911100  |
| N  | 3.53224106  | -3.05197167 | -2.14618800 |
| N  | 3.80622306  | -0.89243867 | -3.21623700 |
| N  | 3.49205806  | -0.54084467 | -0.83850700 |

|   |             |             |             |
|---|-------------|-------------|-------------|
| N | 3.80052506  | 0.51111033  | 1.32226100  |
| N | 3.51907206  | -1.87463967 | 1.66809400  |
| N | -2.42974594 | -1.81122867 | 1.73471100  |
| N | -2.46088194 | -0.47872367 | -0.88870700 |
| N | -2.41645094 | -3.08968067 | -2.26141900 |
| Y | 2.24590306  | -2.46056267 | -0.24427700 |
| Y | -1.29072394 | -2.45299267 | -0.25872500 |
| N | 0.54712606  | 0.76180433  | -1.27344300 |
| N | 0.63155006  | -1.43948667 | 2.95958800  |
| N | 0.65332306  | -3.47450467 | -3.46156700 |
| C | 3.70288706  | -4.78908067 | 1.65819700  |
| C | 3.98827906  | -6.21810467 | 1.66975600  |
| C | 4.25884606  | -7.11372567 | 2.70062000  |
| H | 4.25548406  | -6.78194467 | 3.73186300  |
| C | 4.52476606  | -8.43382867 | 2.35207200  |
| H | 4.73021606  | -9.16362967 | 3.12826100  |
| C | 4.56158706  | -8.84282467 | 1.01402500  |
| H | 4.78959406  | -9.87848467 | 0.78411700  |
| C | 4.29887106  | -7.94973467 | -0.01965800 |
| H | 4.32171206  | -8.25298667 | -1.05939200 |
| C | 4.00382506  | -6.63314867 | 0.32351900  |
| C | 3.72013006  | -5.44870667 | -0.47632000 |
| C | 3.76873706  | -4.34935167 | -2.54491000 |
| C | 4.08602906  | -4.36186467 | -3.96655300 |
| C | 4.38484306  | -5.39292367 | -4.85194300 |
| H | 4.38530106  | -6.42269467 | -4.51544700 |
| C | 4.66387906  | -5.04512667 | -6.16926100 |
| H | 4.89010806  | -5.82094067 | -6.89315800 |
| C | 3.74964406  | -2.71110167 | 2.73461900  |
| C | 4.05993006  | -1.91466367 | 3.91420100  |
| C | 4.35137606  | -2.26155967 | 5.23037700  |
| H | 4.35121106  | -3.30142667 | 5.53424800  |

|   |            |             |             |
|---|------------|-------------|-------------|
| C | 4.62587906 | -1.23362867 | 6.12695200  |
| H | 4.84539506 | -1.47322067 | 7.16220700  |
| N | 3.79833406 | -5.43933567 | -1.79799200 |
| N | 3.47776106 | -4.38577967 | 0.36007000  |
| N | 3.77305706 | -4.03551167 | 2.74031500  |
| C | 0.59068006 | -2.73293067 | 2.71483500  |
| C | 0.75244806 | -3.73891267 | 3.74752700  |
| C | 1.04804106 | -3.63388567 | 5.10427100  |
| H | 1.14101406 | -2.66235867 | 5.57350400  |
| C | 1.23921406 | -4.81474567 | 5.81400700  |
| H | 1.47732106 | -4.77232667 | 6.87150100  |
| C | 1.13644706 | -6.06794667 | 5.18347800  |
| H | 1.28882806 | -6.96807067 | 5.76915400  |
| C | 0.86367706 | -6.17237567 | 3.82366300  |
| H | 0.81702406 | -7.13205767 | 3.32402600  |
| C | 0.68044806 | -4.99153367 | 3.10983700  |
| C | 0.52389806 | -4.72240867 | 1.69031400  |
| C | 0.53320106 | -5.42883267 | -0.52870100 |
| C | 0.70278106 | -6.46522467 | -1.53266700 |
| C | 0.89509606 | -7.84035367 | -1.43275200 |
| H | 0.85144806 | -8.33449067 | -0.47011400 |
| C | 1.17432806 | -8.53881767 | -2.60274400 |
| H | 1.33488806 | -9.61065867 | -2.56046000 |
| C | 1.27241106 | -7.87976067 | -3.84191600 |
| H | 1.51333806 | -8.45502867 | -4.72948700 |
| C | 1.07337106 | -6.50711267 | -3.94515600 |
| H | 1.16367106 | -5.98435567 | -4.88919800 |
| C | 0.77468106 | -5.81041167 | -2.77658000 |
| C | 0.60846706 | -4.39405767 | -2.51169500 |
| N | 0.47680606 | -3.35273567 | 1.48031500  |
| N | 0.48471806 | -4.18850467 | -1.14735500 |
| N | 0.52599106 | -5.67532967 | 0.77047500  |

|   |             |             |             |
|---|-------------|-------------|-------------|
| C | -3.04614494 | -1.82349567 | 3.95556600  |
| H | -3.32747094 | -2.19393667 | 4.92798000  |
| C | -2.69042294 | -2.63263967 | 2.81498900  |
| C | -2.75344894 | -4.03730067 | 2.79728800  |
| C | -2.64202994 | -4.85488267 | 1.65945500  |
| C | -2.78691494 | -6.29247267 | 1.66840700  |
| H | -2.87970294 | -6.90683467 | 2.54918300  |
| C | -2.77646594 | -6.70529167 | 0.37208700  |
| H | -2.86377994 | -7.71536567 | 0.00557100  |
| C | -2.62756594 | -5.52558567 | -0.44908100 |
| C | -2.72371094 | -5.51759267 | -1.85081300 |
| C | -2.67203194 | -4.37952767 | -2.67289500 |
| C | -3.02459394 | -4.37331167 | -4.07710500 |
| H | -3.30724694 | -5.23382467 | -4.66599400 |
| C | -4.37383194 | -5.35338267 | 4.19203000  |
| H | -5.06230794 | -5.32933767 | 3.35501700  |
| C | -3.13047594 | -4.72082267 | 4.07544500  |
| C | -2.27211194 | -4.73886067 | 5.17572600  |
| H | -1.31441694 | -4.24615667 | 5.11028500  |
| C | -2.62389894 | -5.38785167 | 6.35446200  |
| H | -1.94130694 | -5.40792867 | 7.19487300  |
| C | -3.85859494 | -6.01864567 | 6.43650900  |
| C | -4.74485994 | -6.00150067 | 5.36502100  |
| H | -5.71031794 | -6.48490567 | 5.44929100  |
| C | -3.08303694 | -6.81209267 | -2.50726400 |
| C | -2.20754994 | -7.45744467 | -3.38110100 |
| H | -1.24374694 | -7.01878267 | -3.58826800 |
| C | -2.55006394 | -8.66341767 | -3.98435600 |
| H | -1.85566094 | -9.16140267 | -4.64954600 |
| C | -3.79160394 | -9.22511767 | -3.71629300 |
| C | -4.69242994 | -8.59888467 | -2.86166700 |
| H | -5.66171294 | -9.04319367 | -2.67189500 |

|    |             |              |             |
|----|-------------|--------------|-------------|
| C  | -4.33130594 | -7.39690467  | -2.26288900 |
| H  | -5.02926094 | -6.90060067  | -1.59845300 |
| Cl | -4.23385894 | -10.75182367 | -4.47096100 |
| Cl | -4.30971994 | -6.85173767  | 7.91921400  |
| N  | -2.47425294 | -4.42198967  | 0.36168400  |
| C  | 13.12498206 | -1.81131667  | -0.36626200 |
| C  | 13.12095306 | -3.15707967  | -0.02763300 |
| C  | 12.67418306 | -4.14459367  | -0.99515800 |
| C  | 12.25663506 | -3.74782467  | -2.26011400 |
| C  | 12.25980306 | -2.33732567  | -2.61266100 |
| C  | 12.68106206 | -1.39352067  | -1.68283100 |
| C  | 11.95705306 | -0.14241167  | -1.53618700 |
| C  | 10.83831806 | 0.11286533   | -2.32273800 |
| C  | 10.39242606 | -0.87622667  | -3.29210600 |
| C  | 11.08839006 | -2.07501667  | -3.43329200 |
| C  | 10.36035806 | -3.32465667  | -3.58711600 |
| C  | 11.08347306 | -4.35874967  | -2.86240800 |
| C  | 9.66143306  | 0.73210033   | -1.73410800 |
| C  | 8.48812406  | 0.12250533   | -2.33732800 |
| C  | 8.93961006  | -0.87220667  | -3.29900000 |
| C  | 8.24204906  | -2.06920967  | -3.44692900 |
| C  | 8.96783606  | -3.32183667  | -3.59256700 |
| C  | 8.23462906  | -4.35343167  | -2.87489000 |
| C  | 8.92640506  | -5.34360267  | -2.18078300 |
| C  | 10.38029806 | -5.34576667  | -2.17475300 |
| C  | 10.81914306 | -5.76105867  | -0.85082300 |
| C  | 11.94421606 | -5.17560267  | -0.27728500 |
| C  | 7.36065206  | -0.12515867  | -1.56032300 |
| C  | 6.64125506  | -1.37777867  | -1.70969500 |
| C  | 7.06359006  | -2.32624167  | -2.63578000 |
| C  | 7.05987006  | -3.73679767  | -2.28186100 |
| C  | 6.63256406  | -4.13448167  | -1.02018400 |

|   |             |             |             |
|---|-------------|-------------|-------------|
| C | 7.34523006  | -5.17260967 | -0.29643600 |
| C | 8.47043606  | -5.76108767 | -0.86352200 |
| C | 9.64131806  | -6.02094267 | -0.04260400 |
| C | 6.18964006  | -1.79441067 | -0.39614300 |
| C | 6.18491906  | -3.14308867 | -0.05961900 |
| C | 12.66403406 | -3.57287267 | 1.28509800  |
| C | 12.23852306 | -2.62691567 | 2.21111100  |
| C | 12.24433106 | -1.21629967 | 1.85856600  |
| C | 12.67441906 | -0.82153867 | 0.59723600  |
| C | 11.95494606 | 0.21247333  | -0.12719700 |
| C | 10.82752006 | 0.80330033  | 0.43590800  |
| C | 10.37543006 | 0.39017233  | 1.75616900  |
| C | 11.06824306 | -0.60008467 | 2.44999900  |
| C | 10.33426906 | -1.63104867 | 3.16815000  |
| C | 11.05834806 | -2.88388867 | 3.02093600  |
| C | 9.65829106  | 1.06837033  | -0.38278200 |
| C | 8.47921006  | 0.81374433  | 0.42791600  |
| C | 8.92159506  | 0.39433333  | 1.74925700  |
| C | 8.21947706  | -0.59294567 | 2.43710100  |
| C | 8.94175606  | -1.62777767 | 3.16115100  |
| C | 8.21176006  | -2.87721567 | 3.00903000  |
| C | 8.90542906  | -4.07717967 | 2.86717100  |
| C | 10.35831506 | -4.07959167 | 2.87335900  |
| C | 10.80847806 | -5.07077667 | 1.90807700  |
| C | 11.93559506 | -4.82080667 | 1.13184700  |
| C | 7.35668906  | 0.22995533  | -0.14910000 |
| C | 6.63315906  | -0.80501367 | 0.56829900  |
| C | 7.04735106  | -1.20453767 | 1.83371700  |
| C | 7.04163006  | -2.61510667 | 2.18752900  |
| C | 6.62293406  | -3.56175367 | 1.25787600  |
| C | 7.33821006  | -4.81754467 | 1.11481900  |
| C | 8.45802006  | -5.06989067 | 1.90153500  |

|   |             |             |             |
|---|-------------|-------------|-------------|
| C | 9.63402406  | -5.68464767 | 1.30876000  |
| C | 22.02942506 | 0.50699433  | 0.13343400  |
| C | 22.21367006 | 1.74643833  | -0.61236000 |
| C | 22.37797706 | 3.06874233  | -0.21050000 |
| H | 22.39592906 | 3.32520633  | 0.84178600  |
| C | 22.50084206 | 4.03615233  | -1.20338800 |
| H | 22.61913206 | 5.07828233  | -0.92560200 |
| C | 22.47598306 | 3.68835133  | -2.56541400 |
| H | 22.57512006 | 4.46880733  | -3.31258100 |
| C | 22.32960206 | 2.36430333  | -2.96809900 |
| H | 22.30861906 | 2.08411533  | -4.01422700 |
| C | 22.19099806 | 1.39826433  | -1.97582500 |
| C | 21.99676906 | -0.04567767 | -2.03034700 |
| C | 22.04504006 | -2.06715967 | -3.21456700 |
| C | 22.31127406 | -2.80721667 | -4.44123100 |
| C | 22.51912706 | -2.40092667 | -5.75686300 |
| H | 22.50185506 | -1.34957667 | -6.01761100 |
| C | 22.73648306 | -3.38965967 | -6.71154200 |
| H | 22.89239906 | -3.10917567 | -7.74816500 |
| C | 22.09638006 | -0.69503267 | 2.14482700  |
| C | 22.37651806 | -0.75505067 | 3.57401100  |
| C | 22.62051206 | 0.23358133  | 4.52303700  |
| H | 22.63352306 | 1.27801333  | 4.23598700  |
| C | 22.82988006 | -0.17082267 | 5.83842400  |
| H | 23.01266306 | 0.57407733  | 6.60577600  |
| C | 18.93463906 | -0.67997467 | 2.14062000  |
| C | 19.10559006 | 0.71668033  | 2.49228200  |
| C | 19.42567606 | 1.33675633  | 3.69742700  |
| H | 19.53189206 | 0.75416633  | 4.60388000  |
| C | 19.62213206 | 2.71349633  | 3.67935500  |
| H | 19.87951806 | 3.23079233  | 4.59745700  |
| C | 19.49460306 | 3.45118833  | 2.48842300  |



|   |             |             |             |
|---|-------------|-------------|-------------|
| H | 19.64842106 | 4.52458833  | 2.51327300  |
| C | 19.19501706 | 2.82924933  | 1.28081100  |
| H | 19.13072406 | 3.38497533  | 0.35370600  |
| C | 19.01345606 | 1.44912933  | 1.29370700  |
| C | 18.83984906 | 0.47754233  | 0.22735400  |
| C | 18.81323406 | -0.08641767 | -2.03019400 |
| C | 18.94300606 | 0.26942933  | -3.43293900 |
| C | 19.08908506 | 1.49515933  | -4.07646700 |
| H | 19.04229806 | 2.42040833  | -3.51593100 |
| C | 19.32507706 | 1.47918333  | -5.44695000 |
| H | 19.44629906 | 2.41593333  | -5.98005000 |
| C | 19.42658606 | 0.26886733  | -6.15683200 |
| H | 19.63199406 | 0.29595233  | -7.22166500 |
| C | 19.27183406 | -0.95668567 | -5.51758700 |
| H | 19.36197006 | -1.89554367 | -6.04957900 |
| C | 19.01513806 | -0.94050467 | -4.14880900 |
| C | 18.88619306 | -2.00796267 | -3.17520300 |
| N | 18.80598706 | -0.80025067 | 0.76631900  |
| N | 18.78181906 | -1.46703567 | -1.90377500 |
| C | 15.27532606 | -0.88105067 | 3.73431000  |
| H | 14.99770606 | -0.06191067 | 4.37798600  |
| C | 15.63581006 | -0.76401967 | 2.34061200  |
| C | 15.57772706 | 0.44138833  | 1.61857800  |
| C | 15.66637906 | 0.56973033  | 0.22355400  |
| C | 15.45111706 | 1.80577733  | -0.49264700 |
| H | 15.31041506 | 2.77366633  | -0.03894400 |
| C | 15.44305506 | 1.50540733  | -1.81932600 |
| H | 15.30139906 | 2.18519833  | -2.64366900 |
| C | 15.64781706 | 0.07958133  | -1.93623300 |
| C | 15.54751606 | -0.64128867 | -3.13821300 |
| C | 15.60067006 | -2.04059767 | -3.26332800 |
| C | 15.22462706 | -2.75758967 | -4.45942200 |

|    |             |             |             |
|----|-------------|-------------|-------------|
| H  | 14.93372406 | -2.30333167 | -5.39264400 |
| C  | 13.88818606 | 2.20105033  | 2.19613600  |
| H  | 13.22025306 | 1.73652233  | 1.48366700  |
| C  | 15.16807006 | 1.66353733  | 2.38408300  |
| C  | 16.00936806 | 2.26599733  | 3.31768700  |
| H  | 16.99253606 | 1.85980633  | 3.49125800  |
| C  | 15.60016406 | 3.38386133  | 4.03906800  |
| H  | 16.26638806 | 3.84907933  | 4.75489100  |
| C  | 14.32763206 | 3.89760233  | 3.82846400  |
| C  | 13.46017506 | 3.31194033  | 2.91271200  |
| H  | 12.46512506 | 3.71370433  | 2.76715100  |
| C  | 15.19568106 | 0.13015333  | -4.37068700 |
| C  | 16.07007006 | 0.19050133  | -5.45740000 |
| H  | 17.02326806 | -0.31212467 | -5.40010900 |
| C  | 15.73812106 | 0.89116033  | -6.61209400 |
| H  | 16.43065706 | 0.93963233  | -7.44315600 |
| C  | 14.50801906 | 1.53257633  | -6.68372100 |
| C  | 13.61211806 | 1.48401633  | -5.62176000 |
| H  | 12.65127706 | 1.97839433  | -5.69382300 |
| C  | 13.96327006 | 0.78538333  | -4.47221400 |
| H  | 13.26619906 | 0.74629133  | -3.64677500 |
| Cl | 14.07625406 | 2.41938733  | -8.14107300 |
| Cl | 13.80152406 | 5.30992633  | 4.73773800  |
| N  | 21.84424806 | -2.95784267 | -2.18453100 |
| N  | 22.05985406 | -0.74362567 | -3.15412500 |
| N  | 21.82706406 | -0.52580567 | -0.75236800 |
| N  | 22.12120806 | 0.43437933  | 1.45230700  |
| N  | 21.86643006 | -1.96942167 | 1.67826200  |
| N  | 15.89104506 | -2.01767167 | 1.82534600  |
| N  | 15.84971406 | -0.45571467 | -0.68155400 |
| N  | 15.86585606 | -2.94280567 | -2.25415200 |
| Y  | 20.57747406 | -2.46709067 | -0.24489700 |

|   |             |              |             |
|---|-------------|--------------|-------------|
| Y | 17.02353006 | -2.47687667  | -0.22190400 |
| N | 18.81787306 | 0.80600433   | -1.05376800 |
| N | 18.97382506 | -1.65482967  | 3.03259400  |
| N | 18.93662206 | -3.28809067  | -3.50148900 |
| C | 22.03206206 | -4.88067467  | 1.52191500  |
| C | 22.23290806 | -6.32364767  | 1.46491700  |
| C | 22.38957606 | -7.28878567  | 2.45529300  |
| H | 22.38081206 | -7.00871067  | 3.50166400  |
| C | 22.53749506 | -8.61213867  | 2.05066100  |
| H | 22.65033406 | -9.39207767  | 2.79645100  |
| C | 22.54656906 | -8.95983667  | 0.68843300  |
| H | 22.66669906 | -10.00136267 | 0.40911200  |
| C | 22.40603206 | -7.99306867  | -0.30281400 |
| H | 22.41195206 | -8.24953267  | -1.35526700 |
| C | 22.23981406 | -6.67173067  | 0.10128900  |
| C | 22.03973006 | -5.43323367  | -0.64198700 |
| C | 22.07436906 | -4.23105667  | -2.65398600 |
| C | 22.33576306 | -4.16975367  | -4.08674600 |
| C | 22.57223006 | -5.15707867  | -5.03902200 |
| H | 22.59371806 | -6.20150167  | -4.75245100 |
| C | 22.76302706 | -4.75156167  | -6.35689700 |
| H | 22.93952906 | -5.49550367  | -7.12664000 |
| C | 22.08495506 | -2.85906967  | 2.70546800  |
| C | 22.36294806 | -2.11766267  | 3.92881100  |
| C | 22.58927406 | -2.52272467  | 5.24175500  |
| H | 22.58006906 | -3.57409767  | 5.50291200  |
| C | 22.81406706 | -1.53278767  | 6.19351500  |
| H | 22.98428706 | -1.81233067  | 7.22814800  |
| N | 22.11360406 | -5.36029267  | -1.96194400 |
| N | 21.84346806 | -4.40142767  | 0.24630100  |
| N | 22.10548006 | -4.18246167  | 2.64486100  |
| C | 18.92626506 | -2.93524967  | 2.70694700  |

|   |             |             |             |
|---|-------------|-------------|-------------|
| C | 19.07237306 | -4.00187367 | 3.67897800  |
| C | 19.34448806 | -3.98371767 | 5.04468300  |
| H | 19.43533606 | -3.04417867 | 5.57545900  |
| C | 19.51363106 | -5.20826367 | 5.68234600  |
| H | 19.73137806 | -5.23392467 | 6.74478800  |
| C | 19.41100906 | -6.41922367 | 4.97380400  |
| H | 19.54385506 | -7.35515267 | 5.50564700  |
| C | 19.15918606 | -6.43685667 | 3.60604200  |
| H | 19.11124806 | -7.36264667 | 3.04641400  |
| C | 18.99862106 | -5.21218467 | 2.96408000  |
| C | 18.84994606 | -4.85705767 | 1.56283300  |
| C | 18.85120906 | -5.42088267 | -0.69481000 |
| C | 19.01696106 | -6.39161067 | -1.76345100 |
| C | 19.20727506 | -7.77051367 | -1.75331000 |
| H | 19.15885606 | -8.32699167 | -0.82566100 |
| C | 19.49485306 | -8.39045767 | -2.96498500 |
| H | 19.65516506 | -9.46287567 | -2.99210800 |
| C | 19.60193406 | -7.65190967 | -4.15736100 |
| H | 19.85037706 | -8.16745367 | -5.07892200 |
| C | 19.39669406 | -6.27640067 | -4.17248700 |
| H | 19.48737006 | -5.69293867 | -5.08010500 |
| C | 19.08886006 | -5.65867667 | -2.96301600 |
| C | 18.91418906 | -4.26315167 | -2.60914800 |
| N | 18.80899506 | -3.47681667 | 1.43689300  |
| N | 18.80269306 | -4.14352867 | -1.23326400 |
| N | 18.84758806 | -5.74934567 | 0.58640800  |
| C | 15.28370406 | -2.20627467 | 4.03994200  |
| H | 15.00950806 | -2.66187967 | 4.97755500  |
| C | 15.64653206 | -2.92118667 | 2.83842200  |
| C | 15.60143406 | -4.32078067 | 2.71406300  |
| C | 15.68862006 | -5.04085867 | 1.51081200  |
| C | 15.49216306 | -6.46804167 | 1.39694700  |

|    |             |              |             |
|----|-------------|--------------|-------------|
| H  | 15.36747906 | -7.14878967  | 2.22331600  |
| C  | 15.48339906 | -6.76827767  | 0.07030600  |
| H  | 15.34353606 | -7.73721167  | -0.38143300 |
| C  | 15.67956506 | -5.53065967  | -0.64881200 |
| C  | 15.56958106 | -5.40332267  | -2.04222100 |
| C  | 15.61027406 | -4.19795367  | -2.76562500 |
| C  | 15.22893206 | -4.08292967  | -4.15396100 |
| H  | 14.94679806 | -4.90351167  | -4.79383800 |
| C  | 14.05393206 | -5.76086667  | 4.07647300  |
| H  | 13.34150506 | -5.72733367  | 3.26392300  |
| C  | 15.27867106 | -5.09505767  | 3.95270900  |
| C  | 16.17350906 | -5.14862167  | 5.02302000  |
| H  | 17.12157006 | -4.63835467  | 4.94834900  |
| C  | 15.86874306 | -5.85253767  | 6.18329300  |
| H  | 16.57684406 | -5.89566467  | 7.00146500  |
| C  | 14.64560706 | -6.50430167  | 6.27721200  |
| C  | 13.72990906 | -6.46290967  | 5.23195800  |
| H  | 12.77483306 | -6.96555667  | 5.32154800  |
| C  | 15.15532906 | -6.62888867  | -2.79964400 |
| C  | 15.98941106 | -7.23289267  | -3.73870300 |
| H  | 16.96984606 | -6.82474767  | -3.92327800 |
| C  | 15.57684406 | -8.35535767  | -4.45105000 |
| H  | 16.23764506 | -8.82188067  | -5.17105000 |
| C  | 14.30815206 | -8.87223167  | -4.22573400 |
| C  | 13.44773206 | -8.28526167  | -3.30417900 |
| H  | 12.45553306 | -8.68974567  | -3.14708100 |
| C  | 13.87895906 | -7.16972967  | -2.59675300 |
| H  | 13.21633106 | -6.70511067  | -1.87915100 |
| Cl | 13.77790606 | -10.29047367 | -5.12344600 |
| Cl | 14.24837806 | -7.39551867  | 7.74176300  |
| N  | 15.86833906 | -4.50401567  | 0.25360200  |

C<sub>60</sub>

Neutral SCF Energy: -2286.90674838

Negative SCF Energy: -2286.99677352

|   |            |             |             |
|---|------------|-------------|-------------|
| C | 3.07291681 | 0.22569444  | 0.00000000  |
| C | 3.33413381 | 1.62631244  | -0.28637800 |
| C | 4.26274181 | 1.97569744  | -1.26215500 |
| C | 4.97167481 | 0.94002944  | -1.99454100 |
| C | 4.72138381 | -0.40121556 | -1.72062900 |
| C | 3.75136681 | -0.76634356 | -0.70182100 |
| C | 2.86646881 | 0.09089644  | 1.43220800  |
| C | 3.00036781 | 1.40852644  | 2.03094600  |
| C | 3.28886781 | 2.35764144  | 0.96876000  |
| C | 4.17484681 | 3.40679544  | 1.19490000  |
| C | 5.18725281 | 3.07188944  | -1.02652000 |
| C | 6.33444581 | 1.39552044  | -2.21139100 |
| C | 7.38932881 | 0.49049844  | -2.14425100 |
| C | 7.12839781 | -0.91026856 | -1.85838100 |
| C | 5.82310481 | -1.34638756 | -1.65095900 |
| C | 5.53450681 | -2.29513756 | -0.58884100 |
| C | 4.25407081 | -1.93685756 | -0.00237600 |
| C | 4.05637481 | -2.06612656 | 1.36921400  |
| C | 3.34787781 | -1.03022056 | 2.10190400  |
| C | 3.60995681 | 1.54896044  | 3.27411700  |
| C | 4.11240081 | 0.37849644  | 3.97329100  |
| C | 3.98428781 | -0.88318956 | 3.40013600  |
| C | 5.08623081 | -1.82804756 | 3.46985100  |
| C | 5.13091581 | -2.55901656 | 2.21462900  |
| C | 6.35709281 | -2.90184656 | 1.65284300  |
| C | 6.56324481 | -2.76746156 | 0.22058200  |
| C | 7.92619881 | -2.31200956 | 0.00394200  |
| C | 8.20284081 | -1.40359556 | -1.01340100 |
| C | 6.46786381 | 2.71288644  | -1.61264500 |
| C | 9.87076381 | 1.15062744  | 1.06494900  |

|   |            |             |             |
|---|------------|-------------|-------------|
| C | 9.38935481 | 2.27174244  | 0.39525400  |
| C | 8.68085881 | 3.30764844  | 1.12794200  |
| C | 8.48316381 | 3.17838144  | 2.49953200  |
| C | 8.98586781 | 2.00786844  | 3.19897800  |
| C | 9.40309981 | -0.38478956 | 2.78353500  |
| C | 9.44836681 | -1.11611856 | 1.52839500  |
| C | 9.73686581 | -0.16700556 | 0.46621000  |
| C | 9.12727681 | -0.30743956 | -0.77696000 |
| C | 8.62483181 | 0.86302644  | -1.47613600 |
| C | 8.75294381 | 2.12471244  | -0.90298000 |
| C | 7.60631681 | 3.80053944  | 0.28252800  |
| C | 6.38014081 | 4.14336744  | 0.84431300  |
| C | 6.17398881 | 4.00898344  | 2.27657400  |
| C | 7.20272681 | 3.53666044  | 3.08599900  |
| C | 6.91412981 | 2.58791144  | 4.14811600  |
| C | 8.01584981 | 1.64273844  | 4.21778600  |
| C | 7.76555881 | 0.30149344  | 4.49169600  |
| C | 8.47449181 | -0.73417356 | 3.75931000  |
| C | 8.56238681 | -2.16527356 | 1.30225500  |
| C | 7.59269381 | -2.53015156 | 2.32148600  |
| C | 7.54997981 | -1.83036656 | 3.52367500  |
| C | 6.26936981 | -1.47136356 | 4.10979900  |
| C | 6.40278681 | -0.15399556 | 4.70854600  |
| C | 5.34790681 | 0.75102444  | 4.64140600  |
| C | 5.60883481 | 2.15179244  | 4.35553700  |
| C | 4.53439381 | 2.64511844  | 3.51055700  |
| C | 4.81103681 | 3.55353244  | 2.49321500  |
| C | 7.65100381 | 3.06956944  | -0.97269500 |
| C | 5.14453881 | 3.77167344  | 0.17567100  |
| C | 9.66431681 | 1.01582844  | 2.49715500  |

C<sub>60</sub>-relaxation in negative potential surface

Neutral SCF Energy: -2286.90418434

Negative SCF Energy: -2286.99921540

|   |             |             |            |
|---|-------------|-------------|------------|
| C | 0.61728394  | -0.92592591 | 0.00000000 |
| C | -0.52329406 | -0.33771491 | 0.56801700 |
| C | -0.38992606 | 0.69660509  | 1.56371100 |
| C | 0.88459294  | 1.12386209  | 1.97371100 |
| C | 2.06802394  | 0.51102809  | 1.38975400 |
| C | 1.93927494  | -0.48761791 | 0.42808400 |
| C | 2.81615894  | -1.64499191 | 0.45822000 |
| C | 3.78862294  | -1.76060391 | 1.45774100 |
| C | 3.92245194  | -0.72191191 | 2.45933200 |
| C | 3.08129194  | 0.39393609  | 2.42638800 |
| C | 2.51149494  | 0.91242009  | 3.65459400 |
| C | 1.15476294  | 1.36629609  | 3.36929200 |
| C | 4.00777594  | -3.03976491 | 2.10459200 |
| C | 4.27994294  | -2.79243791 | 3.50958500 |
| C | 4.22644194  | -1.35729191 | 3.72868900 |
| C | 3.68105294  | -0.85544691 | 4.90971800 |
| C | 2.80287894  | 0.30416109  | 4.87324200 |
| C | 1.76188394  | 0.11881809  | 5.87006600 |
| C | 0.45367194  | 0.55441909  | 5.59208700 |
| C | 0.15146194  | 1.18195909  | 4.32930200 |
| C | -1.17158606 | 0.73762709  | 3.90582600 |
| C | -1.43180106 | 0.50105609  | 2.55851300 |
| C | 3.78632994  | -3.66298191 | 4.47909800 |
| C | 3.21581494  | -3.13853991 | 5.70818400 |
| C | 3.16481194  | -1.76329191 | 5.91806700 |
| C | 1.98028294  | -1.15514791 | 6.50977100 |
| C | 0.89405494  | -1.96819991 | 6.86203300 |
| C | -0.46272606 | -1.51840491 | 6.57279200 |
| C | -0.67322506 | -0.28952391 | 5.95245300 |
| C | -1.68663006 | -0.16696091 | 4.91561800 |
| C | 2.08808794  | -3.98102791 | 6.07837900 |



|   |             |             |             |
|---|-------------|-------------|-------------|
| C | 0.94749694  | -3.39282291 | 6.64639200  |
| C | -1.65102706 | -1.18019991 | 0.93819900  |
| C | -1.60003206 | -2.55544591 | 0.72830400  |
| C | -0.41550806 | -3.16357391 | 0.13661200  |
| C | 0.67073694  | -2.35054791 | -0.21564000 |
| C | 2.02752094  | -2.80033291 | 0.07357800  |
| C | 2.23800094  | -4.02922091 | 0.69392200  |
| C | 1.11110694  | -4.87315791 | 1.05429200  |
| C | -0.19710406 | -4.43755791 | 0.77632300  |
| C | -1.23809406 | -4.62289991 | 1.77313800  |
| C | -2.11628106 | -3.46330091 | 1.73666300  |
| C | 3.25141194  | -4.15177491 | 1.73076200  |
| C | 2.73637494  | -5.05635291 | 2.74055600  |
| C | 1.41332494  | -5.50069291 | 2.31707900  |
| C | 0.41002594  | -5.68503491 | 3.27709000  |
| C | -0.94671406 | -5.23116191 | 2.99178600  |
| C | -1.51649706 | -4.71266691 | 4.21999300  |
| C | -2.35766306 | -3.59681991 | 4.18705100  |
| C | -2.66166006 | -2.96145091 | 2.91768800  |
| C | -2.71516706 | -1.52630291 | 3.13679700  |
| C | -2.22156206 | -0.65574591 | 2.16727500  |
| C | 2.99657094  | -4.81979091 | 4.08786400  |
| C | 1.95470894  | -5.01534991 | 5.08268800  |
| C | 0.68019794  | -5.44260591 | 4.67265600  |
| C | -0.50323906 | -4.82975891 | 5.25661800  |
| C | -0.37449306 | -3.83111991 | 6.21829600  |
| C | -1.25136206 | -2.67374291 | 6.18814300  |
| C | -2.22383106 | -2.55813091 | 5.18863900  |
| C | -2.44299306 | -1.27897091 | 4.54178200  |

[(Pc)Y(Pc)Y(TCIPP)]

Neutral SCF Energy: -7163.50074456

Positive SCF Energy: -7163.29764072

Negative SCF Energy: -7163.59836114

|   |             |             |             |
|---|-------------|-------------|-------------|
| C | 2.77383267  | 1.83454506  | -0.03630948 |
| C | 1.38788767  | 2.24529106  | 0.15616752  |
| C | 0.20844967  | 1.52367506  | 0.31361252  |
| H | 0.22254667  | 0.44049006  | 0.31154952  |
| C | -0.97542633 | 2.24206706  | 0.45275952  |
| H | -1.91516033 | 1.71153506  | 0.56511452  |
| C | -0.97784733 | 3.64795106  | 0.45292652  |
| H | -1.91939833 | 4.17521906  | 0.56543652  |
| C | 0.20354567  | 4.37047806  | 0.31405752  |
| H | 0.21398767  | 5.45372006  | 0.31220052  |
| C | 1.38546767  | 3.65295306  | 0.15647452  |
| C | 2.76992167  | 4.06859506  | -0.03573448 |
| C | 4.43124967  | 5.72196006  | 0.01336452  |
| C | 4.84241267  | 7.09464506  | 0.28032852  |
| C | 4.12088267  | 8.26326706  | 0.50756952  |
| H | 3.03760367  | 8.24853406  | 0.50884052  |
| C | 4.83898667  | 9.43691006  | 0.71583852  |
| H | 4.30857667  | 10.36806306 | 0.88552952  |
| C | 4.44110467  | 0.18705406  | 0.01144552  |
| C | 4.85686667  | -1.18445694 | 0.27705752  |
| C | 4.13928467  | -2.35580094 | 0.50289752  |
| H | 3.05593767  | -2.34449094 | 0.50454352  |
| C | 4.86131567  | -3.52726194 | 0.70985352  |
| H | 4.33406467  | -4.46042494 | 0.87830652  |
| C | 4.39422267  | 0.21661106  | -3.13870848 |
| C | 3.12461667  | -0.46792794 | -2.98528748 |
| C | 2.81432267  | -1.79564394 | -2.70177748 |
| H | 3.59939467  | -2.53539194 | -2.60596548 |
| C | 1.47265467  | -2.11936094 | -2.52895948 |
| H | 1.19251267  | -3.14255594 | -2.30222248 |
| C | 0.46779867  | -1.14145194 | -2.64020348 |

|   |             |             |             |
|---|-------------|-------------|-------------|
| H | -0.56858233 | -1.43142594 | -2.50528948 |
| C | 0.77959967  | 0.18895306  | -2.90039648 |
| H | 0.01532767  | 0.95442106  | -2.95106248 |
| C | 2.12251267  | 0.51721206  | -3.06275848 |
| C | 2.80537567  | 1.79132006  | -3.21127848 |
| C | 2.80218367  | 4.11871406  | -3.20932248 |
| C | 2.11578767  | 5.39057706  | -3.05947948 |
| C | 0.77188667  | 5.71446006  | -2.89672448 |
| H | 0.00996467  | 4.94669806  | -2.94814348 |
| C | 0.45594567  | 7.04361906  | -2.63509748 |
| H | -0.58131333 | 7.33019306  | -2.49963048 |
| C | 1.45782867  | 8.02449706  | -2.52324248 |
| H | 1.17456567  | 9.04663706  | -2.29565248 |
| C | 2.80049367  | 7.70517906  | -2.69683048 |
| H | 3.58314067  | 8.44741906  | -2.60063648 |
| C | 3.11497667  | 6.37864706  | -2.98137848 |
| C | 4.38665567  | 5.69774806  | -3.13528248 |
| N | 4.17589067  | 1.58038706  | -3.24890348 |
| N | 4.17208167  | 4.33350206  | -3.24634948 |
| C | 4.88189167  | -1.23800394 | -6.84820148 |
| H | 4.22881367  | -2.04276094 | -7.14563848 |
| C | 4.45271967  | 0.08317306  | -6.44976148 |
| C | 3.11607267  | 0.51846806  | -6.48851348 |
| C | 2.68142267  | 1.84882506  | -6.36482348 |
| C | 1.30470567  | 2.27256406  | -6.48311148 |
| H | 0.45337467  | 1.61518406  | -6.55523948 |
| C | 1.30202167  | 3.63224006  | -6.48288248 |
| H | 0.44818567  | 4.28634206  | -6.55484148 |
| C | 2.67701167  | 4.06127306  | -6.36382548 |
| C | 3.10643167  | 5.39352206  | -6.48646648 |
| C | 4.44116267  | 5.83401006  | -6.44749248 |
| C | 4.86479567  | 7.15709906  | -6.84519748 |

|    |             |             |             |
|----|-------------|-------------|-------------|
| H  | 4.20824467  | 7.95938806  | -7.14170348 |
| C  | 1.40360667  | -0.37922094 | -8.08849048 |
| H  | 1.63872767  | 0.44424606  | -8.75279448 |
| C  | 2.08172267  | -0.49143694 | -6.86838848 |
| C  | 1.77878567  | -1.57287094 | -6.03975548 |
| H  | 2.29586867  | -1.68175094 | -5.09899748 |
| C  | 0.81496467  | -2.50920594 | -6.39833448 |
| H  | 0.57895167  | -3.33492194 | -5.73865348 |
| C  | 0.15215267  | -2.36714494 | -7.61063948 |
| C  | 0.44162267  | -1.30964194 | -8.46606348 |
| H  | -0.07435433 | -1.21946194 | -9.41394648 |
| C  | 2.06784567  | 6.39943006  | -6.86523948 |
| C  | 1.75851267  | 7.47742106  | -6.03452948 |
| H  | 2.27454967  | 7.58721306  | -5.09325548 |
| C  | 0.78918067  | 8.40872106  | -6.39144748 |
| H  | 0.54814367  | 9.23173106  | -5.73023948 |
| C  | 0.12761267  | 8.26519406  | -7.60426648 |
| C  | 0.42393667  | 7.21147806  | -8.46203848 |
| H  | -0.09108733 | 7.12026806  | -9.41033448 |
| C  | 1.39133067  | 6.28605306  | -8.08608148 |
| H  | 1.63173967  | 5.46548806  | -8.75207848 |
| Cl | -1.10321133 | 9.43536006  | -8.06426548 |
| Cl | -1.07096033 | -3.54434294 | -8.07315448 |
| N  | 5.54980467  | 4.95183206  | -0.20647548 |
| N  | 3.16549667  | 5.33042106  | 0.03779352  |
| N  | 3.55107667  | 2.95297206  | -0.22759448 |
| N  | 3.17389767  | 0.57411506  | 0.03627852  |
| N  | 5.55708767  | 0.96120606  | -0.20764748 |
| N  | 5.55764367  | 0.85809106  | -6.17049148 |
| N  | 3.48811567  | 2.95662606  | -6.21612648 |
| N  | 5.54906167  | 5.06343306  | -6.16852348 |
| Y  | 5.55367067  | 2.95680206  | -1.48050948 |

|   |             |             |             |
|---|-------------|-------------|-------------|
| Y | 5.55347767  | 2.96018806  | -5.03414248 |
| N | 2.17498967  | 2.95408106  | -3.21275048 |
| N | 5.55776667  | -0.40976094 | -3.09872348 |
| N | 5.54853167  | 6.32705706  | -3.09489048 |
| C | 8.33690967  | 1.84421006  | -0.03601048 |
| C | 9.72142467  | 2.25974906  | 0.15601752  |
| C | 10.90346167 | 1.54217006  | 0.31255152  |
| H | 10.89304867 | 0.45893606  | 0.31001752  |
| C | 12.08487267 | 2.26464006  | 0.45149452  |
| H | 13.02649867 | 1.73732706  | 0.56317952  |
| C | 12.08239167 | 3.67053006  | 0.45234552  |
| H | 13.02214467 | 4.20102406  | 0.56470252  |
| C | 10.89843767 | 4.38896606  | 0.31420352  |
| H | 10.88429567 | 5.47214506  | 0.31295852  |
| C | 9.71894267  | 3.66741606  | 0.15674552  |
| C | 8.33294467  | 4.07826806  | -0.03488848 |
| C | 6.66575267  | 5.72578806  | 0.01359752  |
| C | 6.24983767  | 7.09703706  | 0.28055152  |
| C | 6.96731267  | 8.26813906  | 0.50778752  |
| H | 8.05064267  | 8.25701706  | 0.50909052  |
| C | 6.24514267  | 9.43932806  | 0.71587252  |
| H | 6.77234467  | 10.37229806 | 0.88559952  |
| C | 6.67558267  | 0.19078506  | 0.01145652  |
| C | 6.26437667  | -1.18215694 | 0.27699352  |
| C | 6.98576367  | -2.35110594 | 0.50312952  |
| H | 8.06905967  | -2.33636794 | 0.50500252  |
| C | 6.26756267  | -3.52492494 | 0.71006052  |
| H | 6.79784267  | -4.45633894 | 0.87866452  |
| N | 7.93290967  | 5.33869806  | 0.03837752  |
| N | 7.55565367  | 2.96001506  | -0.22666748 |
| N | 7.94139567  | 0.58227506  | 0.03617952  |
| C | 6.71970867  | 0.21949306  | -3.13874748 |

|   |             |             |             |
|---|-------------|-------------|-------------|
| C | 7.99116467  | -0.46142794 | -2.98477548 |
| C | 8.30563567  | -1.78824994 | -2.70130748 |
| H | 7.52302067  | -2.53063394 | -2.60591748 |
| C | 9.64822167  | -2.10773994 | -2.52789948 |
| H | 9.93149167  | -3.13009794 | -2.30128048 |
| C | 10.65013467 | -1.12667094 | -2.63842548 |
| H | 11.68734467 | -1.41339194 | -2.50290848 |
| C | 10.33417167 | 0.20270506  | -2.89865848 |
| H | 11.09594467 | 0.97066506  | -2.94900848 |
| C | 8.99034867  | 0.52666906  | -3.06186948 |
| C | 8.30400667  | 1.79881006  | -3.21090048 |
| C | 8.30091767  | 4.12604706  | -3.20947548 |
| C | 8.98364767  | 5.40016306  | -3.05996248 |
| C | 10.32663067 | 5.72823506  | -2.89768148 |
| H | 11.09067667 | 4.96264606  | -2.94930648 |
| C | 10.63855767 | 7.05829906  | -2.63617848 |
| H | 11.67494267 | 7.34821406  | -2.50118448 |
| C | 9.63368667  | 8.03609406  | -2.52364348 |
| H | 9.91394067  | 9.05908006  | -2.29608048 |
| C | 8.29202767  | 7.71261506  | -2.69670248 |
| H | 7.50706867  | 8.45238406  | -2.60010248 |
| C | 7.98158867  | 6.38517006  | -2.98154848 |
| C | 6.71210767  | 5.70079006  | -3.13542048 |
| N | 6.93436667  | 1.58386706  | -3.24895748 |
| N | 6.93055167  | 4.33706906  | -3.24659748 |
| N | 8.93109467  | 2.96334306  | -3.21296348 |
| C | 6.24172767  | -1.23529894 | -6.84807748 |
| H | 6.89819267  | -2.03728994 | -7.14557348 |
| C | 6.66550167  | 0.08754106  | -6.44983048 |
| C | 8.00037167  | 0.52809806  | -6.48882148 |
| C | 8.42971567  | 1.86026806  | -6.36539048 |
| C | 9.80471967  | 2.28951206  | -6.48325848 |

|    |             |             |             |
|----|-------------|-------------|-------------|
| H  | 10.65866567 | 1.63550806  | -6.55486248 |
| C  | 9.80196567  | 3.64917806  | -6.48288048 |
| H  | 10.65327367 | 4.30661506  | -6.55450748 |
| C  | 8.42521967  | 4.07277006  | -6.36449848 |
| C  | 7.99041167  | 5.40327806  | -6.48706348 |
| C  | 6.65386567  | 5.83847706  | -6.44772548 |
| C  | 6.22463567  | 7.15978606  | -6.84567548 |
| H  | 6.87767867  | 7.96474406  | -7.14264748 |
| C  | 9.71648067  | -0.36282894 | -8.08845248 |
| H  | 9.47728967  | 0.45899506  | -8.75334248 |
| C  | 9.03881267  | -0.47771294 | -6.86837748 |
| C  | 9.34701667  | -1.55726094 | -6.03916048 |
| H  | 8.83022967  | -1.66831194 | -5.09852248 |
| C  | 10.31603767 | -2.48850594 | -6.39678948 |
| H  | 10.55636767 | -3.31240494 | -5.73639348 |
| C  | 10.97863467 | -2.34352894 | -7.60892548 |
| C  | 10.68356667 | -1.28829494 | -8.46518548 |
| H  | 11.19937167 | -1.19583694 | -9.41294248 |
| C  | 9.02469267  | 6.41358006  | -6.86596948 |
| C  | 9.32917667  | 7.49303406  | -6.03542548 |
| H  | 8.81312067  | 7.60019406  | -5.09390348 |
| C  | 10.29335467 | 8.42940606  | -6.39289848 |
| H  | 10.53045867 | 9.25367106  | -5.73183448 |
| C  | 10.95469767 | 8.28950706  | -7.60626248 |
| C  | 10.66336267 | 7.23425506  | -8.46383048 |
| H  | 11.17812267 | 7.14586006  | -9.41253448 |
| C  | 9.70104167  | 6.30374106  | -8.08724448 |
| H  | 9.46421467  | 5.48220206  | -8.75332848 |
| Cl | 12.17874767 | 9.46642206  | -8.06715448 |
| Cl | 12.20859967 | -3.51408694 | -8.07013848 |
| N  | 7.61854767  | 2.96482906  | -6.21679548 |

[(Pc)Y(Pc)Y(TClPP)]-relaxation in positive potential surface

Neutral SCF Energy: -7163.50074456

Positive SCF Energy: -7163.49904627

|   |             |             |             |
|---|-------------|-------------|-------------|
| C | 3.52173907  | -0.73913042 | 0.00000000  |
| C | 2.13371507  | -1.15696842 | -0.18529800 |
| C | 0.95382307  | -0.44046442 | -0.33768400 |
| H | 0.96080607  | 0.64252458  | -0.34255200 |
| C | -0.22913693 | -1.16783942 | -0.47110400 |
| H | -1.17120593 | -0.64266442 | -0.58351900 |
| C | -0.22386493 | -2.57049542 | -0.47091000 |
| H | -1.16195793 | -3.10276742 | -0.58315200 |
| C | 0.96458307  | -3.28884242 | -0.33726900 |
| H | 0.97982407  | -4.37175542 | -0.34222200 |
| C | 2.13900507  | -2.56335342 | -0.18501000 |
| C | 3.53014707  | -2.97069042 | 0.00043400  |
| C | 5.19957907  | -4.61510042 | -0.04419400 |
| C | 5.61782907  | -5.99097542 | -0.30264700 |
| C | 4.90111707  | -7.16014842 | -0.52384700 |
| H | 3.81808507  | -7.15195742 | -0.53188500 |
| C | 5.62818207  | -8.33346142 | -0.72636300 |
| H | 5.10297207  | -9.26702742 | -0.89530400 |
| C | 5.17933007  | 0.91720158  | -0.04431400 |
| C | 5.58730007  | 2.29619158  | -0.30232300 |
| C | 4.86177907  | 3.46005958  | -0.52291400 |
| H | 3.77881507  | 3.44386958  | -0.53072900 |
| C | 5.57999007  | 4.63880658  | -0.72542400 |
| H | 5.04779507  | 5.56850158  | -0.89382900 |
| C | 5.12269307  | 0.89017358  | 3.05824700  |
| C | 3.84269807  | 1.56679158  | 2.92504500  |
| C | 3.51732307  | 2.89435058  | 2.66870500  |
| H | 4.29178307  | 3.64605158  | 2.57967800  |
| C | 2.16826707  | 3.20769258  | 2.52155600  |
| H | 1.87441807  | 4.23218358  | 2.32170200  |



|   |            |             |            |
|---|------------|-------------|------------|
| C | 1.17573607 | 2.22057558  | 2.63241000 |
| H | 0.13487607 | 2.50388458  | 2.52389800 |
| C | 1.50464507 | 0.88675458  | 2.86422200 |
| H | 0.74791907 | 0.11428958  | 2.91904800 |
| C | 2.85178907 | 0.57202858  | 2.99845500 |
| C | 3.54964307 | -0.70018342 | 3.12121900 |
| C | 3.56682607 | -3.02901642 | 3.12075700 |
| C | 2.88768007 | -4.31127542 | 2.99643200 |
| C | 1.54581707 | -4.64622942 | 2.85786500 |
| H | 0.77726807 | -3.88541842 | 2.91097200 |
| C | 1.23769907 | -5.98470542 | 2.62419900 |
| H | 0.20150207 | -6.28334642 | 2.51218200 |
| C | 2.24496907 | -6.95715742 | 2.51673500 |
| H | 1.96707807 | -7.98585542 | 2.31566600 |
| C | 3.58879407 | -6.62379842 | 2.66865900 |
| H | 4.37480707 | -7.36371342 | 2.58243200 |
| C | 3.89332707 | -5.29139842 | 2.92525800 |
| C | 5.16312907 | -4.59616842 | 3.05932900 |
| N | 4.91912507 | -0.47764742 | 3.15131500 |
| N | 4.93934307 | -3.23143842 | 3.15247100 |
| C | 5.62591107 | 2.31322858  | 6.87331900 |
| H | 4.97333007 | 3.09379958  | 7.22902700 |
| C | 5.19749307 | 1.01736758  | 6.39649900 |
| C | 3.85509707 | 0.59120358  | 6.38644000 |
| C | 3.42297207 | -0.73697242 | 6.21724800 |
| C | 2.04202807 | -1.16625642 | 6.24402500 |
| H | 1.18467607 | -0.51330442 | 6.25613300 |
| C | 2.04266807 | -2.52511642 | 6.24431400 |
| H | 1.18593807 | -3.17889742 | 6.25694400 |
| C | 3.42394007 | -2.95296842 | 6.21741300 |
| C | 3.85689707 | -4.28107742 | 6.38636000 |
| C | 5.19915607 | -4.70647642 | 6.39641700 |

|    |             |             |             |
|----|-------------|-------------|-------------|
| C  | 5.62836507  | -6.00209542 | 6.87309000  |
| H  | 4.97610407  | -6.78333442 | 7.22796100  |
| C  | 1.98335807  | 1.41555758  | 7.84799900  |
| H  | 2.11196407  | 0.53687658  | 8.46881200  |
| C  | 2.81400007  | 1.60092658  | 6.73443300  |
| C  | 2.65500507  | 2.76621058  | 5.98022100  |
| H  | 3.29661407  | 2.93753758  | 5.12944000  |
| C  | 1.67983807  | 3.70454458  | 6.29547200  |
| H  | 1.55641207  | 4.59548758  | 5.69247400  |
| C  | 0.85700007  | 3.48461658  | 7.39400100  |
| C  | 1.00824307  | 2.34795558  | 8.18205000  |
| H  | 0.37642207  | 2.20053658  | 9.04899400  |
| C  | 2.81623107  | -5.29131042 | 6.73425100  |
| C  | 2.65389007  | -6.45362842 | 5.97619600  |
| H  | 3.29203207  | -6.62229742 | 5.12229000  |
| C  | 1.67992107  | -7.39293942 | 6.29215600  |
| H  | 1.55413807  | -8.28180442 | 5.68658500  |
| C  | 0.86138507  | -7.17670242 | 7.39465800  |
| C  | 1.01533307  | -6.04248442 | 8.18566100  |
| H  | 0.38651607  | -5.89764442 | 9.05521600  |
| C  | 1.98933007  | -5.10904742 | 7.85103100  |
| H  | 2.12021607  | -4.23215942 | 8.47393900  |
| Cl | -0.37491993 | -8.35233042 | 7.79804800  |
| Cl | -0.38105993 | 4.65865958  | 7.79648800  |
| N  | 6.31288607  | -3.83633342 | 0.16701100  |
| N  | 3.93114607  | -4.23160242 | -0.06782700 |
| N  | 4.30777007  | -1.85198242 | 0.18241900  |
| N  | 3.91365907  | 0.52448458  | -0.06851800 |
| N  | 6.29834807  | 0.14671258  | 0.16677200  |
| N  | 6.30548207  | 0.25752658  | 6.08453800  |
| N  | 4.23878707  | -1.84479142 | 6.11490200  |
| N  | 6.30718307  | -3.94573242 | 6.08491500  |

|   |             |             |             |
|---|-------------|-------------|-------------|
| Y | 6.30577007  | -1.84469542 | 1.43916300  |
| Y | 6.30619307  | -1.84424042 | 4.97694900  |
| N | 2.93028007  | -1.86910342 | 3.11806000  |
| N | 6.28132107  | 1.52791658  | 3.02528500  |
| N | 6.33069607  | -5.21696642 | 3.02610800  |
| C | 9.08101207  | -0.71891842 | -0.00041200 |
| C | 10.47211207 | -1.12626742 | -0.18618600 |
| C | 11.64648907 | -0.40078442 | -0.33888300 |
| H | 11.63122007 | 0.68213058  | -0.34407100 |
| C | 12.83490907 | -1.11913542 | -0.47276300 |
| H | 13.77296307 | -0.58686742 | -0.58534900 |
| C | 12.84019307 | -2.52179042 | -0.47276500 |
| H | 13.78223607 | -3.04697842 | -0.58535000 |
| C | 11.65727107 | -3.24916142 | -0.33895000 |
| H | 11.65028907 | -4.33215242 | -0.34374600 |
| C | 10.47741007 | -2.53265742 | -0.18634800 |
| C | 9.08943407  | -2.95047642 | -0.00061800 |
| C | 7.43184607  | -4.60680942 | -0.04438900 |
| C | 7.02381507  | -5.98576842 | -0.30246200 |
| C | 7.74928307  | -7.14962342 | -0.52331800 |
| H | 8.83225007  | -7.13347942 | -0.53120000 |
| C | 7.03100607  | -8.32829842 | -0.72603000 |
| H | 7.56315407  | -9.25798542 | -0.89463000 |
| C | 7.41160807  | 0.92554658  | -0.04442000 |
| C | 6.99328907  | 2.30144658  | -0.30264500 |
| C | 7.70993807  | 3.47070858  | -0.52358500 |
| H | 8.79297207  | 3.46257958  | -0.53159600 |
| C | 6.98281207  | 4.64403658  | -0.72578900 |
| H | 7.50797307  | 5.57766858  | -0.89452300 |
| N | 8.69751707  | -4.21410542 | -0.06891800 |
| N | 8.30343307  | -1.83761742 | 0.18186600  |
| N | 8.68003407  | 0.54202258  | -0.06841900 |

|   |             |             |            |
|---|-------------|-------------|------------|
| C | 7.44890207  | 0.90711158  | 3.05825100 |
| C | 8.71865007  | 1.60227858  | 2.92330800 |
| C | 9.02309307  | 2.93454358  | 2.66585900 |
| H | 8.23705107  | 3.67442258  | 2.57957200 |
| C | 10.36685907 | 3.26780658  | 2.51318600 |
| H | 10.64467907 | 4.29639858  | 2.31147500 |
| C | 11.37416707 | 2.29539758  | 2.62070400 |
| H | 12.41032107 | 2.59396858  | 2.50807600 |
| C | 11.06613507 | 0.95703558  | 2.85513900 |
| H | 11.83469507 | 0.19622158  | 2.90820400 |
| C | 9.72432607  | 0.62217458  | 2.99448500 |
| C | 9.04522807  | -0.66002442 | 3.11958600 |
| C | 9.06241707  | -2.98886342 | 3.12072300 |
| C | 9.76022707  | -4.26113342 | 2.99815700 |
| C | 11.10735307 | -4.57593042 | 2.86387300 |
| H | 11.86410207 | -3.80346042 | 2.91838100 |
| C | 11.43620107 | -5.90984642 | 2.63247900 |
| H | 12.47704707 | -6.19321942 | 2.52397500 |
| C | 10.44363507 | -6.89698242 | 2.52208500 |
| H | 10.73743107 | -7.92155342 | 2.32255800 |
| C | 9.09459607  | -6.58356742 | 2.66932800 |
| H | 8.32012607  | -7.33530442 | 2.58069700 |
| C | 8.76927907  | -5.25590442 | 2.92521900 |
| C | 7.48932807  | -4.57919842 | 3.05850000 |
| N | 7.67272007  | -0.45760942 | 3.15162800 |
| N | 7.69294807  | -3.21136042 | 3.15120000 |
| N | 9.68179407  | -1.81994242 | 3.11706900 |
| C | 6.98446307  | 2.31383158  | 6.87271800 |
| H | 7.63676307  | 3.09496658  | 7.22775300 |
| C | 7.41356707  | 1.01826458  | 6.39589800 |
| C | 8.75583007  | 0.59286458  | 6.38581200 |
| C | 9.18872107  | -0.73529642 | 6.21682000 |

|    |             |             |            |
|----|-------------|-------------|------------|
| C  | 10.57000107 | -1.16323042 | 6.24318900 |
| H  | 11.42679007 | -0.50951942 | 6.25533600 |
| C  | 10.57059007 | -2.52209742 | 6.24319900 |
| H  | 11.42791407 | -3.17510242 | 6.25516600 |
| C  | 9.18962207  | -2.95128642 | 6.21697700 |
| C  | 8.75750807  | -4.27942342 | 6.38642800 |
| C  | 7.41517007  | -4.70556642 | 6.39677900 |
| C  | 6.98692907  | -6.00148742 | 6.87353000 |
| H  | 7.63966307  | -6.78210242 | 7.22892700 |
| C  | 10.62262207 | 1.42158058  | 7.85116300 |
| H  | 10.49123307 | 0.54516758  | 8.47462700 |
| C  | 9.79642307  | 1.60314458  | 6.73373000 |
| C  | 9.95927407  | 2.76505958  | 5.97513100 |
| H  | 9.32170007  | 2.93323558  | 5.12070500 |
| C  | 10.93311207 | 3.70449758  | 6.29109100 |
| H  | 11.05929307 | 4.59299758  | 5.68506500 |
| C  | 11.75099907 | 3.48887458  | 7.39419500 |
| C  | 11.59648807 | 2.35514858  | 8.18579300 |
| H  | 12.22473407 | 2.21080958  | 9.05584500 |
| C  | 9.79852607  | -5.28908042 | 6.73478400 |
| C  | 9.95827107  | -6.45409042 | 5.98032700 |
| H  | 9.31719007  | -6.62538642 | 5.12915100 |
| C  | 10.93344607 | -7.39229542 | 6.29595100 |
| H  | 11.05743107 | -8.28304642 | 5.69277700 |
| C  | 11.75549807 | -7.17251742 | 7.39510500 |
| C  | 11.60345007 | -6.03613042 | 8.18340300 |
| H  | 12.23468807 | -5.88878342 | 9.05078700 |
| C  | 10.62833507 | -5.10386542 | 7.84898000 |
| H  | 10.49914207 | -4.22534042 | 8.46990900 |
| Cl | 12.99352007 | -8.34642542 | 7.79810700 |
| Cl | 12.98711507 | 4.66468158  | 7.79762400 |
| N  | 8.37381307  | -1.84346442 | 6.11467100 |

[(Pc)Y(Pc)Y(TCIPP)]-relaxation in negative potential surface

Neutral SCF Energy: -7163.49818130

Negative SCF Energy: -7163.60093179

|   |             |             |             |
|---|-------------|-------------|-------------|
| C | 0.40564373  | -0.23809523 | 0.00000000  |
| C | -0.98142627 | -0.64546723 | -0.19133500 |
| C | -2.15926627 | 0.07905577  | -0.34736600 |
| H | -2.14247227 | 1.16222677  | -0.34504000 |
| C | -3.34505027 | -0.63640723 | -0.48534400 |
| H | -4.28363827 | -0.10354623 | -0.59649100 |
| C | -3.35087827 | -2.04227923 | -0.48587700 |
| H | -4.29386627 | -2.56723423 | -0.59742200 |
| C | -2.17107427 | -2.76772423 | -0.34859200 |
| H | -2.16325427 | -3.85101623 | -0.34712300 |
| C | -0.98724327 | -2.05314123 | -0.19207800 |
| C | 0.39643073  | -2.47210123 | -0.00123700 |
| C | 2.05388073  | -4.12926923 | -0.05128200 |
| C | 2.46172673  | -5.50285623 | -0.31887500 |
| C | 1.73732273  | -6.66955523 | -0.54698900 |
| H | 0.65405973  | -6.65199623 | -0.54880800 |
| C | 2.45259573  | -7.84486723 | -0.75569600 |
| H | 1.91991873  | -8.77465423 | -0.92597300 |
| C | 2.07677573  | 1.40533077  | -0.04807300 |
| C | 2.49593573  | 2.77587877  | -0.31364700 |
| C | 1.78123573  | 3.94898077  | -0.53937200 |
| H | 0.69785173  | 3.94048377  | -0.54046100 |
| C | 2.50626673  | 5.11859277  | -0.74654400 |
| H | 1.98131673  | 6.05309477  | -0.91500900 |
| C | 2.02990673  | 1.37663577  | 3.10031300  |
| C | 0.76203573  | 2.06423777  | 2.94698600  |
| C | 0.45465473  | 3.39252677  | 2.66283400  |
| H | 1.24131373  | 4.13050577  | 2.56623800  |

|   |             |             |            |
|---|-------------|-------------|------------|
| C | -0.88628127 | 3.71925677  | 2.49027800 |
| H | -1.16413127 | 4.74299877  | 2.26306200 |
| C | -1.89346627 | 2.74382477  | 2.60267400 |
| H | -2.92920527 | 3.03624777  | 2.46788900 |
| C | -1.58465627 | 1.41291877  | 2.86372300 |
| H | -2.35056727 | 0.64912777  | 2.91530900 |
| C | -0.24239727 | 1.08155177  | 3.02540200 |
| C | 0.43717473  | -0.19416323 | 3.17434600 |
| C | 0.42857073  | -2.52138723 | 3.17341100 |
| C | -0.26047527 | -3.79181123 | 3.02369300 |
| C | -1.60512727 | -4.11292823 | 2.86141500 |
| H | -2.36534027 | -3.34346223 | 2.91312400 |
| C | -1.92400027 | -5.44138223 | 2.60004300 |
| H | -2.96192527 | -5.72580223 | 2.46491400 |
| C | -0.92424227 | -6.42446223 | 2.48786700 |
| H | -1.20985627 | -7.44600323 | 2.26040000 |
| C | 0.41911373  | -6.10797923 | 2.66087200 |
| H | 1.20020973  | -6.85184323 | 2.56444900 |
| C | 0.73650873  | -4.78205923 | 2.94527000 |
| C | 2.00957173  | -4.10398423 | 3.09878700 |
| N | 1.80807773  | 0.01328077  | 3.21098800 |
| N | 1.79788573  | -2.73909223 | 3.21019700 |
| C | 2.52196973  | 2.83239677  | 6.80871500 |
| H | 1.87088073  | 3.63930777  | 7.10475500 |
| C | 2.08942473  | 1.51178477  | 6.41211100 |
| C | 0.75178373  | 1.07990377  | 6.45190200 |
| C | 0.31358273  | -0.24934823 | 6.32870600 |
| C | -1.06415327 | -0.66935823 | 6.44819700 |
| H | -1.91369127 | -0.00969123 | 6.52118400 |
| C | -1.07046027 | -2.02906723 | 6.44762600 |
| H | -1.92608527 | -2.68083623 | 6.51990500 |
| C | 0.30331273  | -2.46181223 | 6.32804300 |

|    |             |             |             |
|----|-------------|-------------|-------------|
| C  | 0.72906573  | -3.79521223 | 6.45059200  |
| C  | 2.06270573  | -4.23937623 | 6.41078600  |
| C  | 2.48312473  | -5.56393023 | 6.80716500  |
| H  | 1.82467673  | -6.36493523 | 7.10301800  |
| C  | -0.95630127 | 1.98292377  | 8.05345900  |
| H  | -0.72178227 | 1.15973577  | 8.71834000  |
| C  | -0.27983527 | 2.09241477  | 6.83223600  |
| C  | -0.58172527 | 3.17341677  | 6.00269800  |
| H  | -0.06567127 | 3.28012577  | 5.06108800  |
| C  | -1.54318127 | 4.11216677  | 6.36158400  |
| H  | -1.77827827 | 4.93777377  | 5.70141400  |
| C  | -2.20444527 | 3.97281277  | 7.57501800  |
| C  | -1.91586027 | 2.91569677  | 8.43129500  |
| H  | -2.43064227 | 2.82775377  | 9.38006300  |
| C  | -0.31191027 | -4.79834023 | 6.83012400  |
| C  | -0.62336627 | -5.87634623 | 6.00010800  |
| H  | -0.10759827 | -5.98780523 | 5.05887100  |
| C  | -1.59462427 | -6.80544423 | 6.35761700  |
| H  | -1.83735227 | -7.62840723 | 5.69690400  |
| C  | -2.25610727 | -6.65963623 | 7.57021400  |
| C  | -1.95798627 | -5.60567823 | 8.42706500  |
| H  | -2.47312627 | -5.51262023 | 9.37515200  |
| C  | -0.98871027 | -4.68247823 | 8.05058400  |
| H  | -0.74703327 | -3.86168023 | 8.71584300  |
| Cl | -3.48898827 | -7.82720423 | 8.03117400  |
| Cl | -3.42478427 | 5.15273577  | 8.03789600  |
| N  | 3.17428373  | -3.36202723 | 0.16920800  |
| N  | 0.78897973  | -3.73488023 | -0.07521400 |
| N  | 1.18044873  | -1.35841523 | 0.19005200  |
| N  | 0.80862473  | 1.02145877  | -0.07243700 |
| N  | 3.19079973  | 0.62847277  | 0.17115500  |
| N  | 3.19231373  | 0.73375677  | 6.13359600  |



|   |             |             |             |
|---|-------------|-------------|-------------|
| N | 1.11724173  | -1.35927723 | 6.17977400  |
| N | 3.17263373  | -3.47136123 | 6.13257300  |
| Y | 3.18253673  | -1.36731523 | 1.44403900  |
| Y | 3.18247173  | -1.36849423 | 4.99783300  |
| N | -0.19584127 | -1.35545523 | 3.17675200  |
| N | 3.19501473  | 1.99997777  | 3.06000600  |
| N | 3.17001873  | -4.73594123 | 3.05823600  |
| C | 5.96867573  | -0.26113323 | 0.00012400  |
| C | 7.35235773  | -0.67988323 | -0.19106600 |
| C | 8.53622073  | 0.03486777  | -0.34654300 |
| H | 8.52842973  | 1.11815677  | -0.34368400 |
| C | 9.71601373  | -0.69043323 | -0.48466100 |
| H | 10.65902573 | -0.16536323 | -0.59545500 |
| C | 9.71013973  | -2.09630323 | -0.48596300 |
| H | 10.64871673 | -2.62905023 | -0.59772700 |
| C | 8.52432373  | -2.81190623 | -0.34900400 |
| H | 8.50749973  | -3.89507623 | -0.34807400 |
| C | 7.34649873  | -2.08755423 | -0.19210600 |
| C | 5.95942373  | -2.49513323 | -0.00125500 |
| C | 4.28831973  | -4.13854523 | -0.05116900 |
| C | 3.86916473  | -5.50870423 | -0.31874300 |
| C | 4.58386973  | -6.68144623 | -0.54632500 |
| H | 5.66724973  | -6.67292523 | -0.54749400 |
| C | 3.85885173  | -7.85075123 | -0.75526800 |
| H | 4.38381073  | -8.78498123 | -0.92521000 |
| C | 4.31120273  | 1.39603977  | -0.04818700 |
| C | 3.90337073  | 2.77001677  | -0.31378500 |
| C | 4.62778973  | 3.93706377  | -0.54005000 |
| H | 5.71105373  | 3.91951277  | -0.54180600 |
| C | 3.91252373  | 5.11269577  | -0.74698000 |
| H | 4.44520873  | 6.04274577  | -0.91578500 |
| N | 5.55644873  | -3.75459323 | -0.07524000 |

|   |            |             |             |
|---|------------|-------------|-------------|
| N | 5.18463073 | -1.37502023 | 0.19006600  |
| N | 5.57612473 | 1.00173077  | -0.07236200 |
| C | 4.35546673 | 1.36801077  | 3.10032200  |
| C | 5.62852073 | 2.04611477  | 2.94690000  |
| C | 5.94591073 | 3.37212477  | 2.66293200  |
| H | 5.16482073 | 4.11603877  | 2.56683200  |
| C | 7.28925173 | 3.68864477  | 2.48991000  |
| H | 7.57485873 | 4.71025877  | 2.26277000  |
| C | 8.28900573 | 2.70550977  | 2.60163600  |
| H | 9.32691673 | 2.98995777  | 2.46647500  |
| C | 7.97013573 | 1.37696877  | 2.86257000  |
| H | 8.73033273 | 0.60746277  | 2.91388400  |
| C | 6.62549373 | 1.05581877  | 3.02487100  |
| C | 5.93644073 | -0.21465723 | 3.17410100  |
| C | 5.92785973 | -2.54187923 | 3.17381100  |
| C | 6.60742773 | -3.81754223 | 3.02444000  |
| C | 7.94970573 | -4.14887223 | 2.86287200  |
| H | 8.71561373 | -3.38511123 | 2.91485300  |
| C | 8.25854173 | -5.47968923 | 2.60141200  |
| H | 9.29429873 | -5.77208223 | 2.46670600  |
| C | 7.25136773 | -6.45507023 | 2.48853600  |
| H | 7.52923973 | -7.47874223 | 2.26103700  |
| C | 5.91041073 | -6.12838623 | 2.66100600  |
| H | 5.12375873 | -6.86632723 | 2.56406200  |
| C | 5.60299673 | -4.80018023 | 2.94550600  |
| C | 4.33511073 | -4.11261023 | 3.09884900  |
| N | 4.56713173 | 0.00306277  | 3.21104700  |
| N | 4.55695373 | -2.74931123 | 3.21022300  |
| N | 6.56086173 | -1.38059023 | 3.17684200  |
| C | 3.88179273 | 2.82624777  | 6.80848100  |
| H | 4.54022573 | 3.62722377  | 7.10444400  |
| C | 4.30222773 | 1.50176977  | 6.41184300  |

|    |            |             |            |
|----|------------|-------------|------------|
| C  | 5.63587573 | 1.05762377  | 6.45138300 |
| C  | 6.06161373 | -0.27575323 | 6.32846200 |
| C  | 7.43539473 | -0.70854123 | 6.44773200 |
| H  | 8.29103073 | -0.05680323 | 6.52012500 |
| C  | 7.42906973 | -2.06824523 | 6.44794900 |
| H  | 8.27861073 | -2.72793223 | 6.52066400 |
| C  | 6.05132973 | -2.48821623 | 6.32836100 |
| C  | 5.61314073 | -3.81750323 | 6.45117700 |
| C  | 4.27551073 | -4.24940223 | 6.41109800 |
| C  | 3.84294673 | -5.57008823 | 6.80743400 |
| H  | 4.49401873 | -6.37703523 | 7.10340500 |
| C  | 7.35380373 | 1.94503977  | 8.05114200 |
| H  | 7.11211473 | 1.12437177  | 8.71655600 |
| C  | 6.67693173 | 2.06074077  | 6.83070500 |
| C  | 6.98841273 | 3.13858577  | 6.00048400 |
| H  | 6.47263873 | 3.24988677  | 5.05922300 |
| C  | 7.95973673 | 4.06769477  | 6.35778800 |
| H  | 8.20248173 | 4.89052977  | 5.69692200 |
| C  | 8.62127373 | 3.92205677  | 7.57037400 |
| C  | 8.32314573 | 2.86825277  | 8.42741300 |
| H  | 8.83833073 | 2.77532877  | 9.37548700 |
| C  | 6.64467173 | -4.83003123 | 6.83169900 |
| C  | 6.94657173 | -5.91115023 | 6.00232000 |
| H  | 6.43059673 | -6.01794923 | 5.06068800 |
| C  | 7.90793073 | -6.84991823 | 6.36140000 |
| H  | 8.14303673 | -7.67561423 | 5.70134500 |
| C  | 8.56909173 | -6.71047723 | 7.57487900 |
| C  | 8.28048273 | -5.65326023 | 8.43101800 |
| H  | 8.79517173 | -5.56525223 | 9.37983000 |
| C  | 7.32101173 | -4.72047223 | 8.05298900 |
| H  | 7.08647073 | -3.89721323 | 8.71777300 |
| Cl | 9.78931473 | -7.89042823 | 8.03799300 |

|    |            |             |            |
|----|------------|-------------|------------|
| Cl | 9.85424673 | 5.08963077  | 8.03107100 |
| N  | 5.24767673 | -1.37822923 | 6.17985000 |

## References.

- (1) X. Sun, R. Li, D. Wang, J. Dou, P. Zhu, F. Lu, C. Ma, C.-F. Choi, D. Y. Y. Cheng, D. K. P. Ng, N. Kobayashi and J. Jiang, *Eur. J. Inorg. Chem.*, 2004, 3806.
- (2) G. M. Sheldrick, SHELX-97, Universität Göttingen, Germany, 1997.
- (3) A.D. Becke, *J. Chem. Phys.*, 1993, 5648.
- (4) C. Lee, W. Yang, R.G. Parr, *Phys. Rev. B*, 1988, 785.
- (5) S. Grimme, S. Ehrlich, L. Goerigk. *J. Comp. Chem.*, 2011, 1456.
- (6) R. Krishnan, J.S. Binkley, R. Seeger, J. A. Pople, *J. Chem. Phys.*, 1980, 650.
- (7) P. J. Hay, W. R. Wadt, *J. Chem. Phys.*, 1985, 284.
- (8) W. Humphrey, A. Dalke, K. Schulten, *J. Molec. Graphics*, 1996, 33.
- (9) E. R. Johnson, S. Keinan, P. Mori-Sanchez, J. Contreras-Garcia, A. J. Cohen, W. Yang, *J. Am. Chem. Soc.*, 2010, 6498.
- (10) M. Frisch, et al., Gaussian, Inc., Wallingford CT, 2009.
- (11) T. Lu, F. Chen, *J. Comput. Chem.*, 2012, 580.
- (12) C. Wang, H. Wang, C. Liu, D. Qi, J. Jiang, *Inorg. Chem. Front.*, **2019**, 654.
- (13) T. Wakahara, et al., *J. Am. Chem. Soc.* **2012**, 7204.
- (14) Y. Qin, et. al., *Adv. Mater.* **2014**, 4093.
- (15) X. Kong, X. Zhang, D. Gao, D. Qi, Y. Chen, J. Jiang, *Chem. Sci.* **2015**, 1967.
- (16) W. Liang, C. Huang, K. Wu, S. Wu, S. Chang, Y. Cheng, C. Wang, *Chem. Sci.* **2016**, 2768

- (17) G. Lu, X. Kong, P. Ma, K. Wang, Y. Chen, J. Jiang, *ACS Appl. Mater. Interfaces* **2016**, 6174.
- (18) S. Zheng, et. al., *Nano Res.* **2018**, 1917.
- (19) X. Zhang, J. Mao, W. Deng, X. Xu, L. Huang, X. Zhang, S. Lee, J. Jie, *Adv. Mater.* **2018**, 1800187.
- (20) X. Cui, C. Xiao, T. Winands, T. Koch, Y. Li, L. Zhang, N. L. Doltsinis, Z. Wang, *J. Am. Chem. Soc.* **2018**, 12175.
- (21) Z. Ni, H. Wang, Q. Zhao, J. Zhang, Z. Wei, H. Dong, W. Hu, *Adv. Mater.* **2019**, 1806010.
- (22) X. Zhu, et. al., *Small* **2019**, 1902187.
